# Supplementary material for: Novel electroluminescent donor–acceptors based on dibenzo[a,c]phenazine as hole-transporting materials for organic electronics
Source: Royal Society of Chemistry journal article supplement (doi:10.1039/c6nj03553a), 2016-12-19
Supplement: c6nj03553a1.pdf [file c6nj03553a1.pdf]

**Novel electroluminescent donor-acceptors based on dibenzo[*a,c*]phenazine as  
hole transport materials for organic electronics**

**Azam M. Shaikh,<sup>a</sup> Bharat K. Sharma,<sup>a</sup> Sajeev Chacko<sup>b</sup> and Rajesh M. Kamble<sup>\*a</sup>**

*<sup>a</sup>Department of Chemistry, University of Mumbai, Santacruz (East), Mumbai–400 098, India*

*<sup>b</sup>Department of Physics, University of Mumbai, Santacruz (East), Mumbai–400 098, India*

\*Email: [kamblerm@chem.mu.ac.in](mailto:kamblerm@chem.mu.ac.in)

**Supplementary Information**

|                                                                                             |              |
|---------------------------------------------------------------------------------------------|--------------|
| 1) Photophysical data of compounds <b>2–6</b> in various solvents.....                      | <b>3–4</b>   |
| 2) Emission of compounds <b>2–6</b> .....                                                   | <b>5</b>     |
| 3) Absorption and Emission spectra of compound <b>1</b> in toluene.....                     | <b>6</b>     |
| 4) Absorption and Emission spectra of compound <b>2–6</b> in various solvents.....          | <b>7–8</b>   |
| 5) Tapping mode AFM topographical image of compound <b>2–6</b> .....                        | <b>10–11</b> |
| 6) Cyclic voltammetry (CV) of compounds <b>2–6</b> in anhydrous dichloromethane.....        | <b>12</b>    |
| 7) Mass spectra of compound <b>1</b> .....                                                  | <b>13</b>    |
| 8) HRMS spectra of compounds <b>2–6</b> .....                                               | <b>14–18</b> |
| 9) FTIR Spectra of compounds <b>1–6</b> .....                                               | <b>19–21</b> |
| 10) <sup>1</sup> H and <sup>13</sup> C NMR spectra of compounds <b>1–6</b> .....            | <b>22–27</b> |
| 11) Optimized structures of compounds <b>2–6</b> .....                                      | <b>28–30</b> |
| 12) Cartesian coordinates of compounds <b>2–6</b> .....                                     | <b>31–50</b> |
| a. <b>Table S1.</b> Cartesian coordinates of optimized structure of compound <b>2</b> ..... | <b>31–34</b> |
| b. <b>Table S2.</b> Cartesian coordinates of optimized structure of compound <b>3</b> ..... | <b>34–38</b> |
| c. <b>Table S3.</b> Cartesian coordinates of optimized structure of compound <b>4</b> ..... | <b>39–43</b> |
| d. <b>Table S4.</b> Cartesian coordinates of optimized structure of compound <b>5</b> ..... | <b>43–48</b> |
| e. <b>Table S5.</b> Cartesian coordinates of optimized structure of compound <b>6</b> ..... | <b>48–50</b> |

## 1. Photophysical data of compounds **2–6** in various solvents

### a. Photophysical data of compounds **2–6** in cyclohexane.

| Compound | $\lambda_{\text{emi}}^{\text{a}}$<br>nm | Stokes<br>shift<br>$\text{cm}^{-1}$ | $E_g^{\text{opt}}$<br>(eV) | $\phi_{\text{F}}$ |
|----------|-----------------------------------------|-------------------------------------|----------------------------|-------------------|
| <b>2</b> | 510                                     | 12965                               | 2.40                       | 0.53              |
| <b>3</b> | 508                                     | 11370                               | 2.38                       | 0.38              |
| <b>4</b> | 540                                     | 14054                               | 2.34                       | 0.51              |
| <b>5</b> | —                                       | —                                   | —                          | —                 |
| <b>6</b> | 494                                     | 14239                               | 2.47                       | 0.50              |

<sup>a</sup>Recorded in  $10^{-5}$  M cyclohexane.

### b. Photophysical data of compounds **2–6** in dichloromethane.

| Compound | $\lambda_{\text{emi}}^{\text{a}}$<br>nm | Stokes<br>shift<br>$\text{cm}^{-1}$ | $E_g^{\text{opt}}$<br>(eV) | $\phi_{\text{F}}$ |
|----------|-----------------------------------------|-------------------------------------|----------------------------|-------------------|
| <b>2</b> | 562                                     | 14779                               | 2.26                       | 0.49              |
| <b>3</b> | 552                                     | 12371                               | 2.29                       | 0.32              |
| <b>4</b> | —                                       | —                                   | —                          | —                 |
| <b>5</b> | —                                       | —                                   | —                          | —                 |
| <b>6</b> | 538                                     | 15082                               | 2.27                       | 0.50              |

<sup>a</sup>Recorded in  $10^{-5}$  M dichloromethane.

c. Photophysical data of compounds **2–6** in dimethyl sulfoxide (DMSO).

| <b>Compound</b> | $\lambda_{\text{emi}}^{\text{a}}$<br><b>nm</b> | <b>Stokes<br/>shift<br/>cm<sup>-1</sup></b> | $E_g^{\text{opt}}$<br><b>(eV)</b> | $\phi_{\text{F}}$ |
|-----------------|------------------------------------------------|---------------------------------------------|-----------------------------------|-------------------|
| <b>2</b>        | 587                                            | 15537                                       | 2.21                              | 0.54              |
| <b>3</b>        | 563                                            | 12633                                       | 2.24                              | 0.55              |
| <b>4</b>        | —                                              | —                                           | —                                 | —                 |
| <b>5</b>        | —                                              | —                                           | —                                 | —                 |
| <b>6</b>        | 565                                            | 11816                                       | 2.25                              | 0.65              |

<sup>a</sup>Recorded in 10<sup>-5</sup> M dimethylsulfoxide.

**2. Emission of compounds 2-6 in various solvents under UV light (365 nm)**

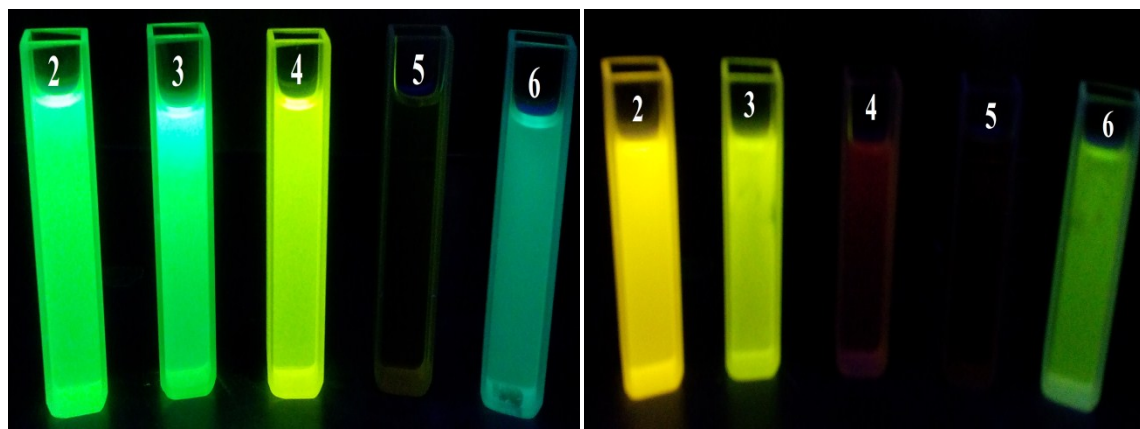

**Cyclohexane**

**Dichloromethane**

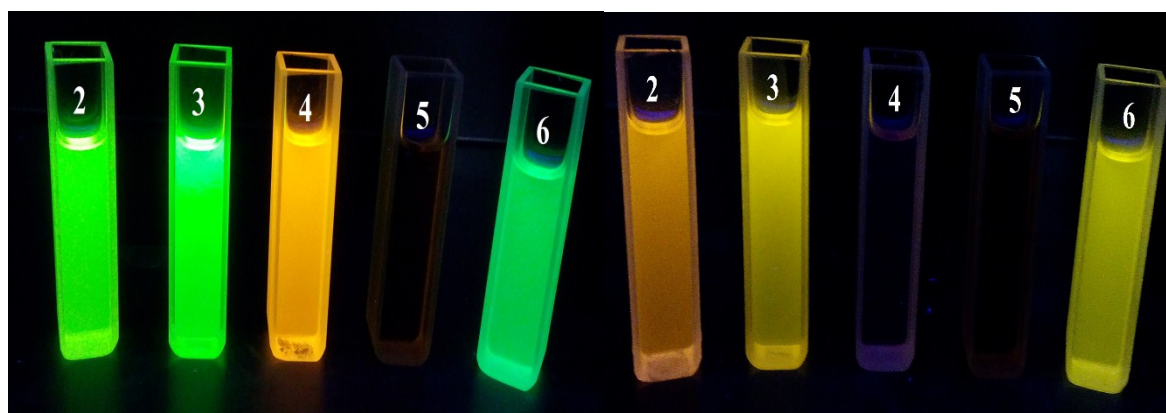

**Toluene**

**Dimethyl sulfoxide**

### 3. Absorption and emission spectra of compound **1** in toluene

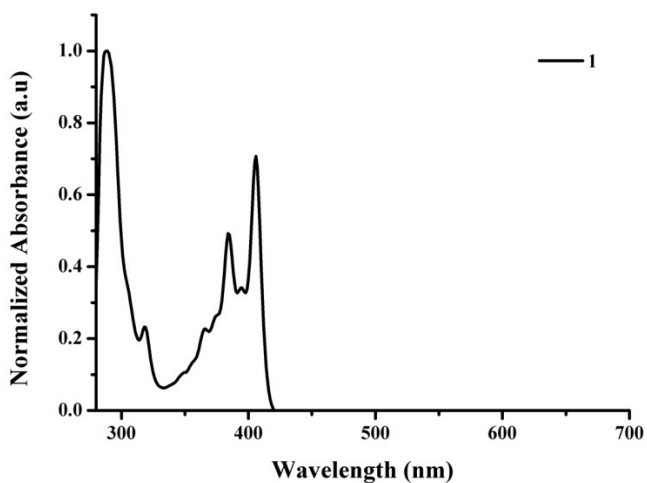

**Fig. S1** Absorption spectra of **1** in toluene

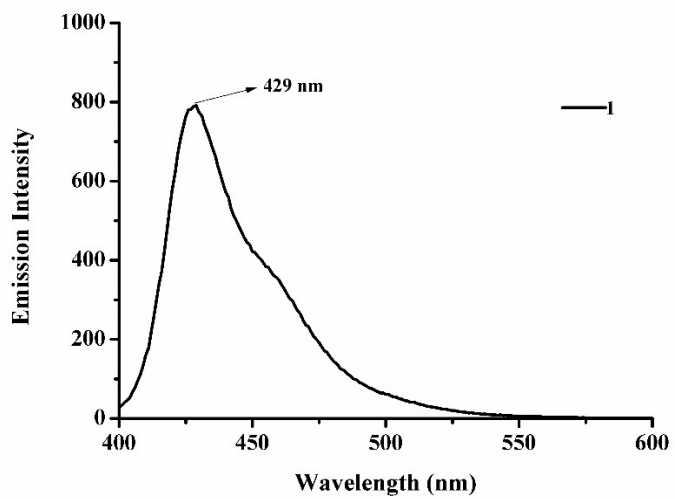

**Fig. S2** Emission spectra of **1** in toluene

#### 4. Absorption and Emission spectra of compound 2-6 in various solvents

##### a. Absorption spectra of compound 2-6

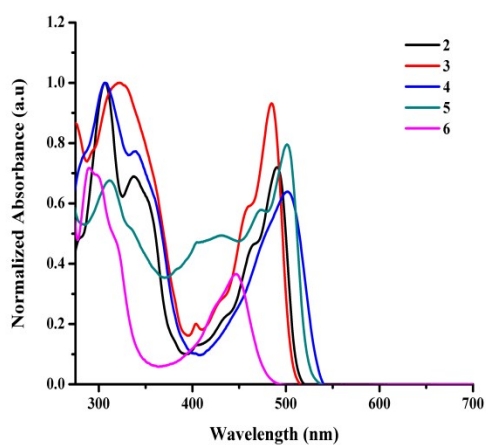

(a) Cyclohexane

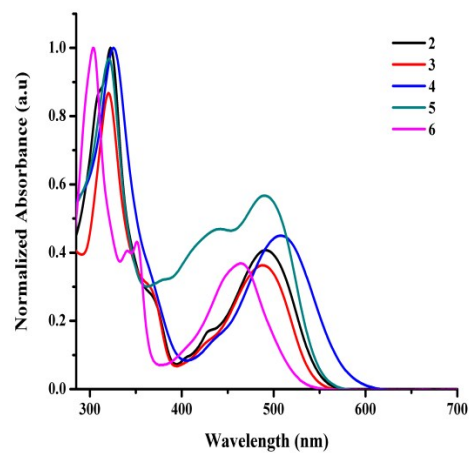

(b) Dichloromethane

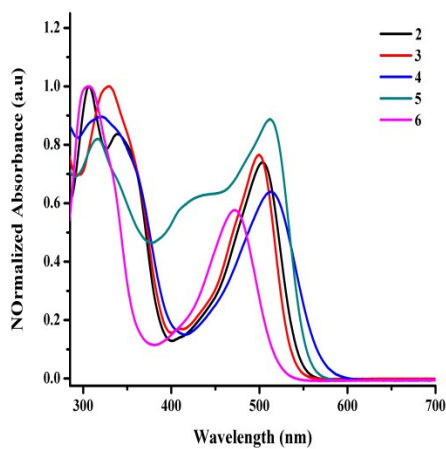

(c) Dimethyl sulfoxide

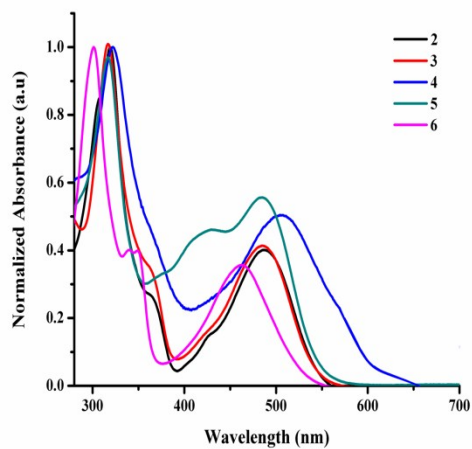

(d) Methanol

**b. Emission spectra of compounds 2-6**

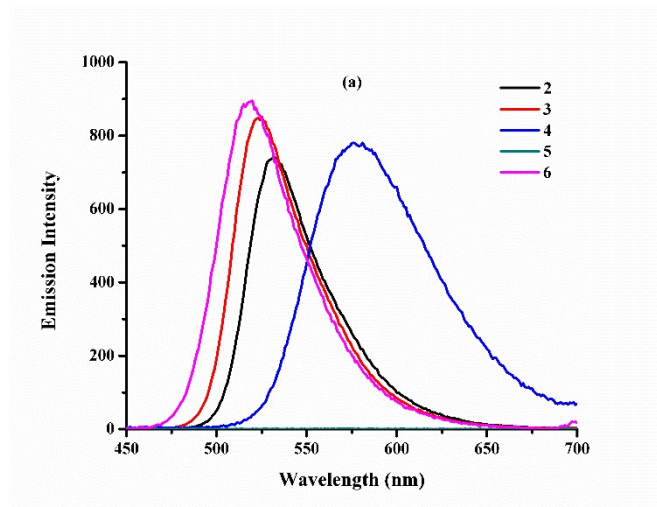

**(a)** Toluene

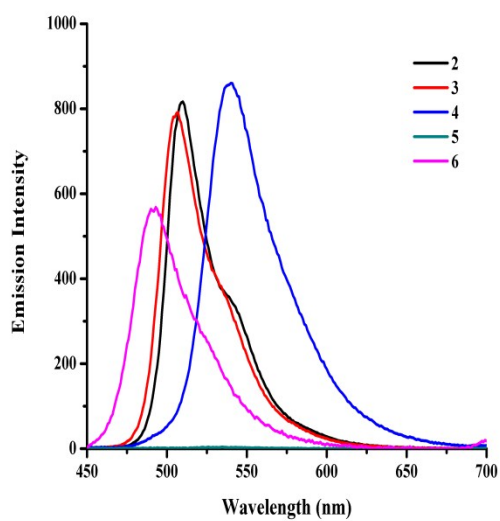

**(b)** Cyclohexane

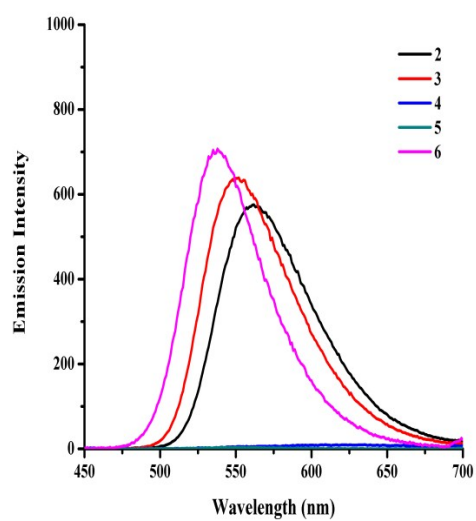

**(c)** Dichloromethane



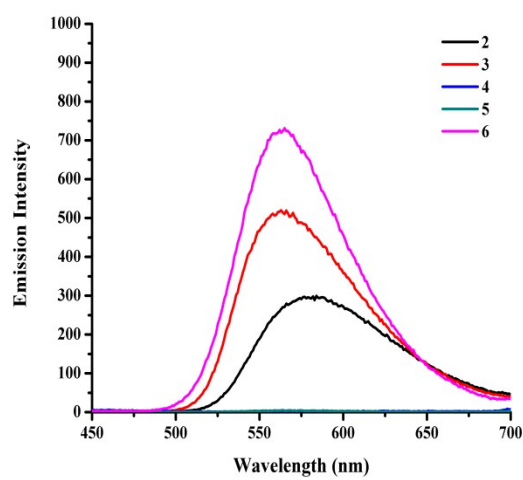

(d) Dimethyl sulfoxide

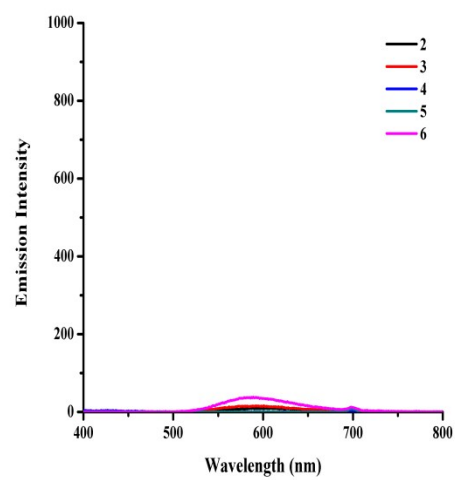

(e) Methanol

5. Tapping mode AFM topographical image of compound **2** **6**

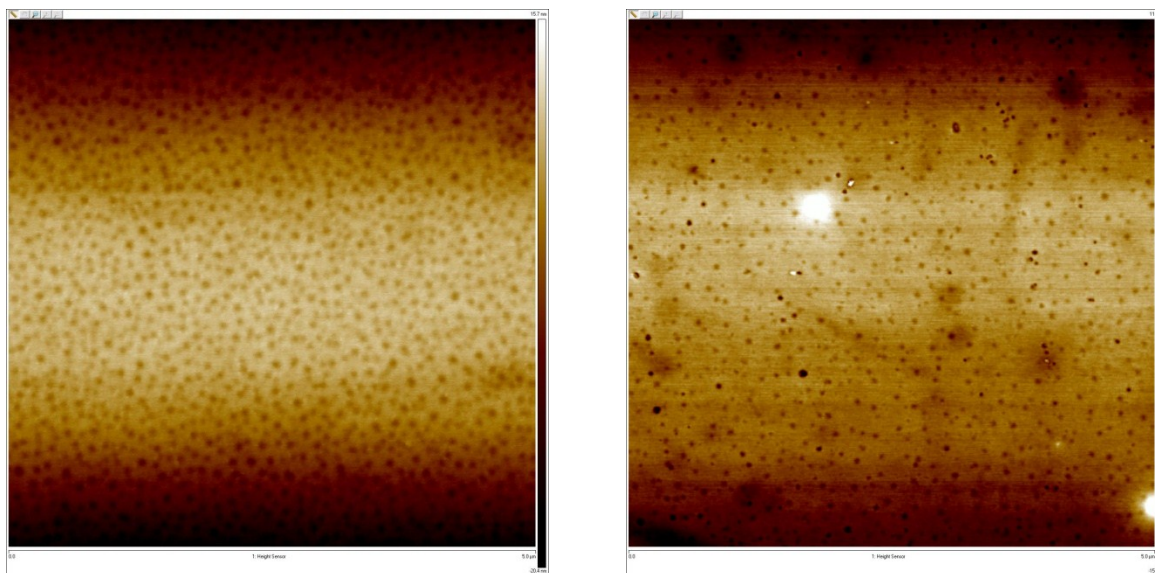

AFM topographical image (2D) of compound **2** and **3**

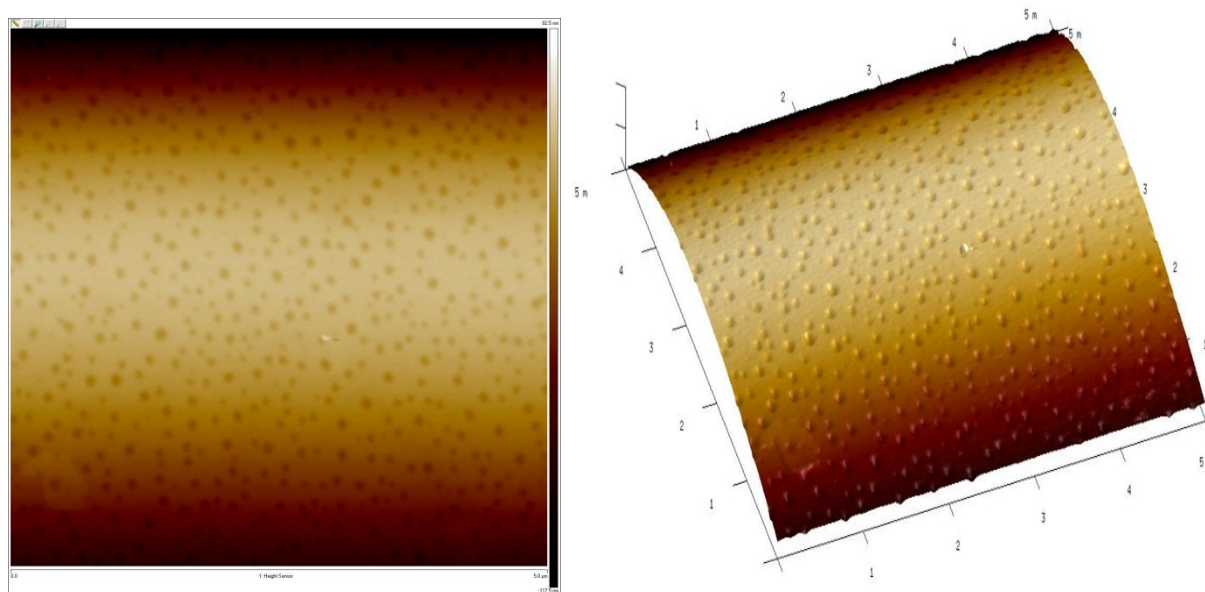

AFM topographical image **2D** (left) and **3D** (right) of compound **4**

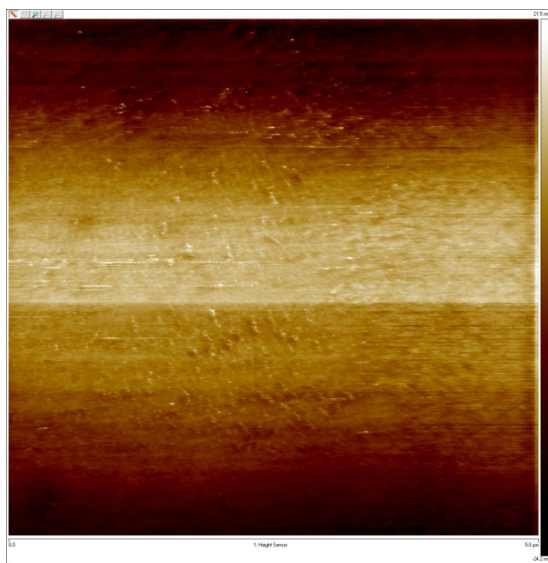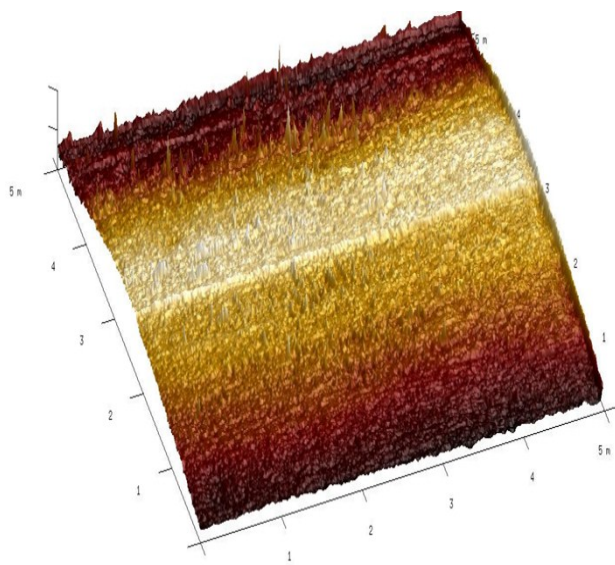

AFM topographical image **2D** (left) and **3D** (right) of compound **5**

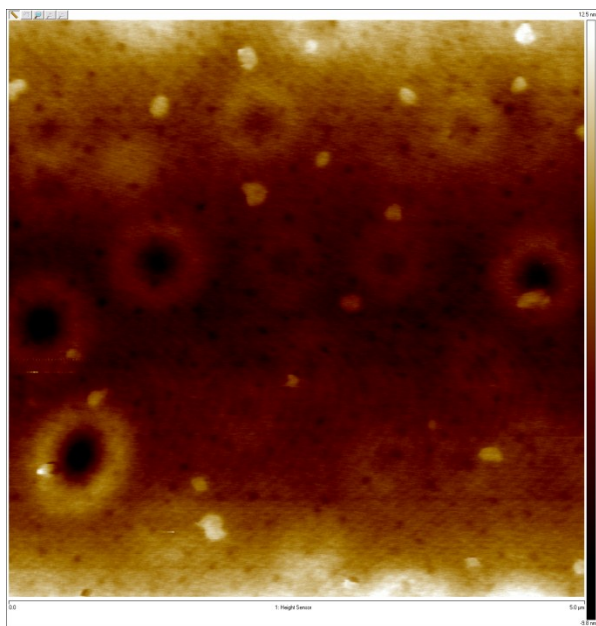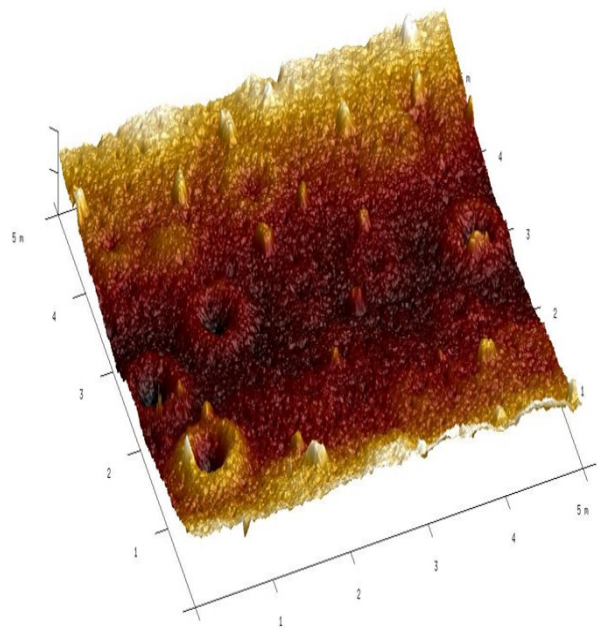

AFM topographical image **2D** (left) and **3D** (right) of compound **6**

## 6. Cyclic Voltammogram of compounds 2 6

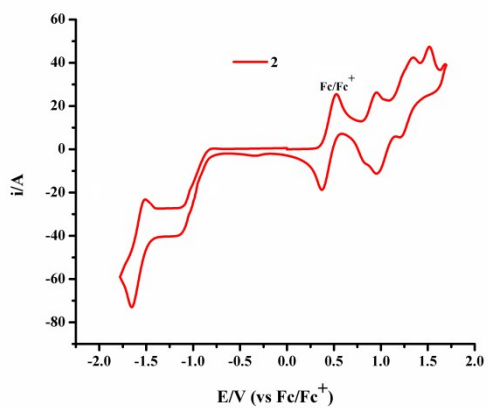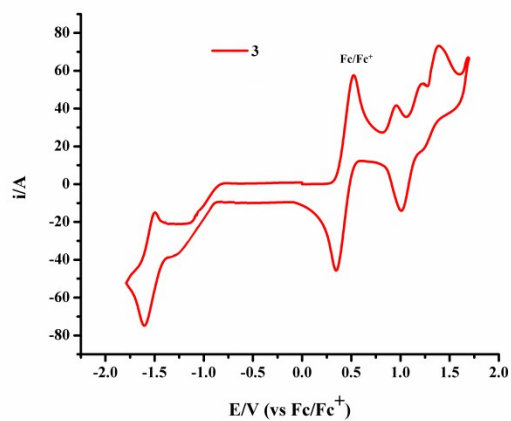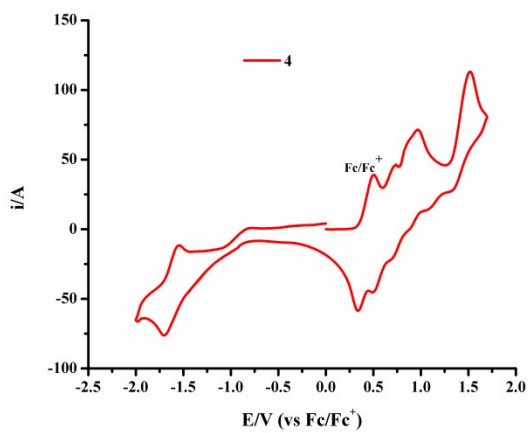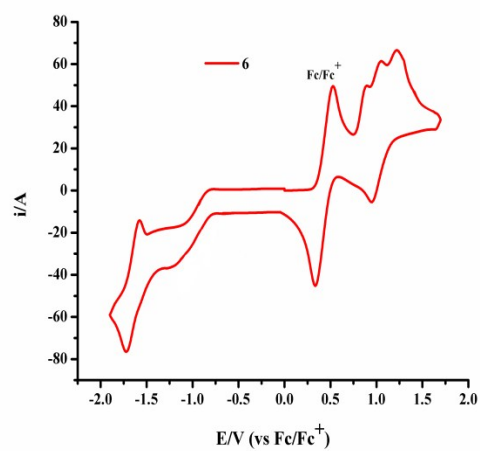

## 6. Mass spectra of compound 1

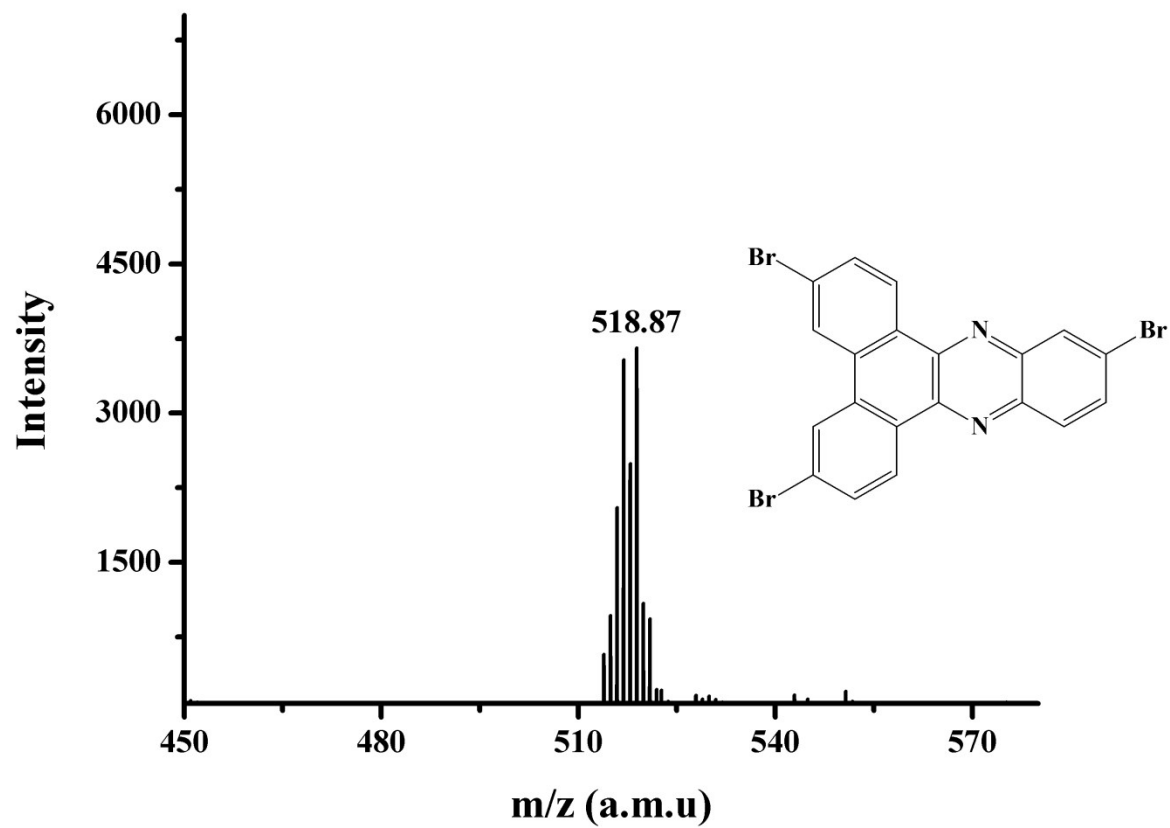



## 7. HRMS spectra of compounds 2 6.

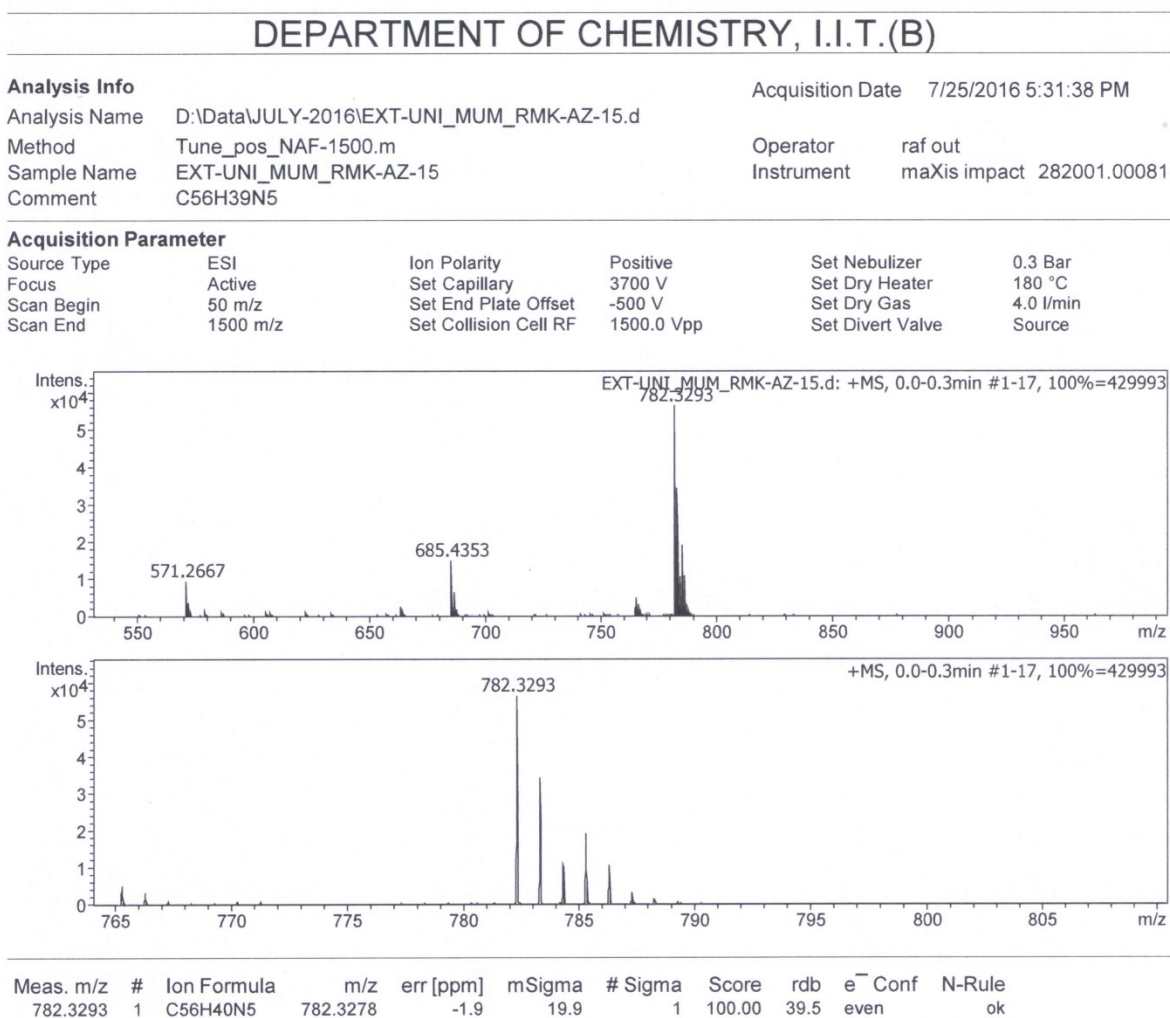

**Fig. S3** HRMS Spectra of compound **2**

# DEPARTMENT OF CHEMISTRY, I.I.T.(B)

## Analysis Info

Analysis Name D:\Data\JULY-2016\EXT-UNI\_MUM\_RMK-AZ-16.d  
 Method Tune\_pos\_NAF-1500.m  
 Sample Name EXT-UNI\_MUM\_RMK-AZ-16  
 Comment C68H45N5

Acquisition Date 7/25/2016 5:44:47 PM

Operator raf out  
 Instrument maXis impact 282001.00081

## Acquisition Parameter

|             |          |                       |            |                  |           |
|-------------|----------|-----------------------|------------|------------------|-----------|
| Source Type | ESI      | Ion Polarity          | Positive   | Set Nebulizer    | 0.3 Bar   |
| Focus       | Active   | Set Capillary         | 3700 V     | Set Dry Heater   | 180 °C    |
| Scan Begin  | 50 m/z   | Set End Plate Offset  | -500 V     | Set Dry Gas      | 4.0 l/min |
| Scan End    | 1500 m/z | Set Collision Cell RF | 1500.0 Vpp | Set Divert Valve | Source    |

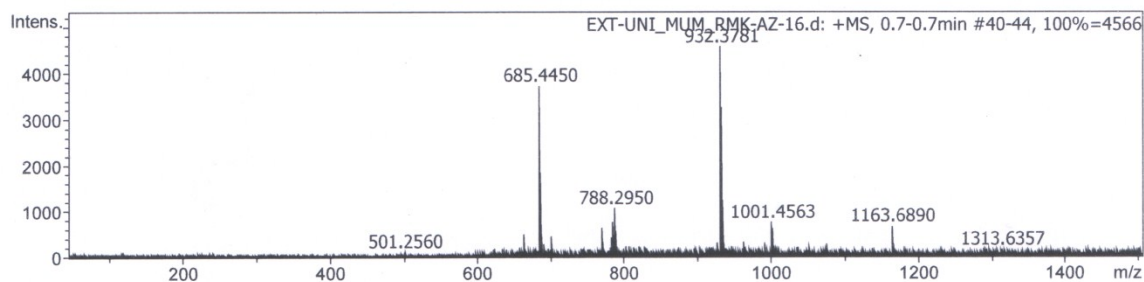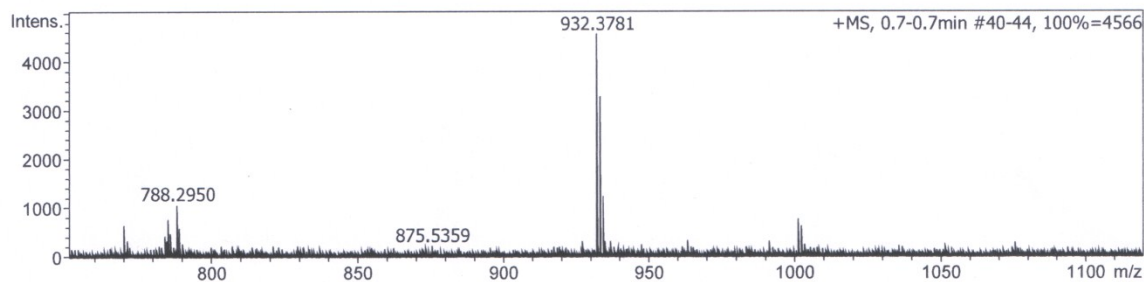

| Meas. m/z | # | Ion Formula | m/z      | err [ppm] | mSigma | # Sigma | Score  | rdb  | e <sup>-</sup> Conf | N-Rule |
|-----------|---|-------------|----------|-----------|--------|---------|--------|------|---------------------|--------|
| 932.3781  | 1 | C68H46N5    | 932.3646 | 0.9       | 717.9  | 1       | 100.00 | 45.5 | even                | ok     |

**Fig. S4** HRMS Spectra of compound **3**

## DEPARTMENT OF CHEMISTRY, I.I.T.(B)

### Analysis Info

Analysis Name D:\Data\JULY-2016\EXT-UNI\_MUM-RMK-AZ-17.d  
 Method Tune\_pos\_NAICSI-1500.m  
 Sample Name EXT-UNI\_MUM-RMK-AZ-17  
 Comment C62H51N5O6

Acquisition Date 8/1/2016 4:19:42 PM

Operator gkl-in  
 Instrument maXis impact 282001.00081

### Acquisition Parameter

|             |          |                       |            |                  |           |
|-------------|----------|-----------------------|------------|------------------|-----------|
| Source Type | ESI      | Ion Polarity          | Positive   | Set Nebulizer    | 0.3 Bar   |
| Focus       | Active   | Set Capillary         | 3700 V     | Set Dry Heater   | 180 °C    |
| Scan Begin  | 50 m/z   | Set End Plate Offset  | -500 V     | Set Dry Gas      | 4.0 l/min |
| Scan End    | 1500 m/z | Set Collision Cell RF | 2100.0 Vpp | Set Divert Valve | Source    |

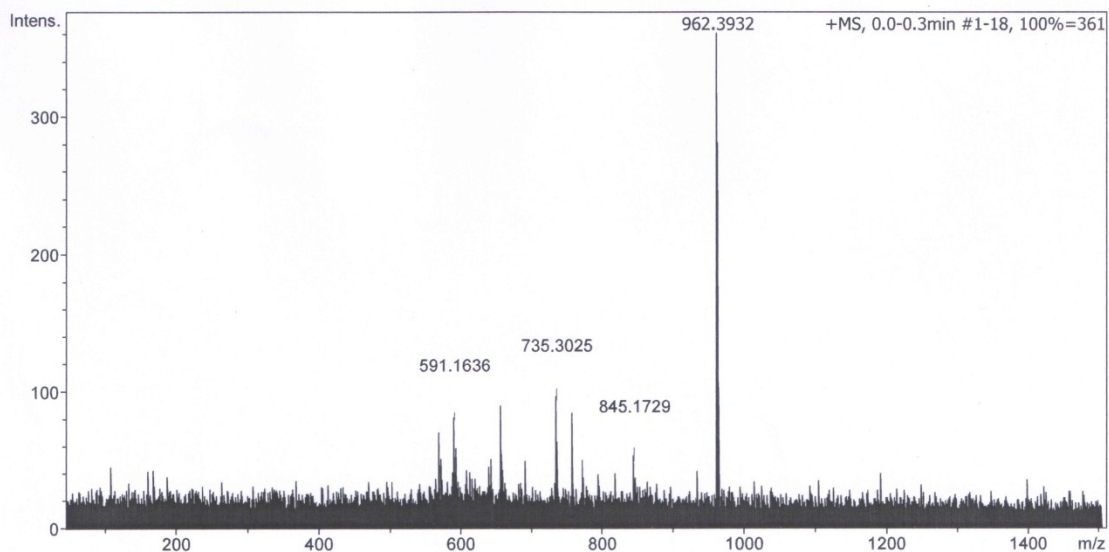

| Meas. m/z | # | Ion Formula | m/z      | err [ppm] | mSigma | # Sigma | Score  | rdb  | e <sup>-</sup> Conf | N-Rule |
|-----------|---|-------------|----------|-----------|--------|---------|--------|------|---------------------|--------|
| 962.3932  | 1 | C62H52N5O6  | 962.3912 | -2.0      | 48.4   | 1       | 100.00 | 39.5 | even                | ok     |

**Fig. S5** HRMS Spectra of compound **4**



# DEPARTMENT OF CHEMISTRY, I.I.T.(B)

## Analysis Info

Analysis Name D:\Data\JULY-2016\EXT-UNI\_MUM-RMK-AZ-18.d  
 Method Tune\_pos\_NAICSI-1500.m  
 Sample Name EXT-UNI\_MUM-RMK-AZ-18  
 Comment C74H51N11

Acquisition Date 8/1/2016 4:40:58 PM

Operator gkl-in  
 Instrument maXis impact 282001.00081

## Acquisition Parameter

|             |          |                       |            |                  |           |
|-------------|----------|-----------------------|------------|------------------|-----------|
| Source Type | ESI      | Ion Polarity          | Positive   | Set Nebulizer    | 0.3 Bar   |
| Focus       | Active   | Set Capillary         | 3700 V     | Set Dry Heater   | 180 °C    |
| Scan Begin  | 50 m/z   | Set End Plate Offset  | -500 V     | Set Dry Gas      | 4.0 l/min |
| Scan End    | 1500 m/z | Set Collision Cell RF | 2100.0 Vpp | Set Divert Valve | Source    |

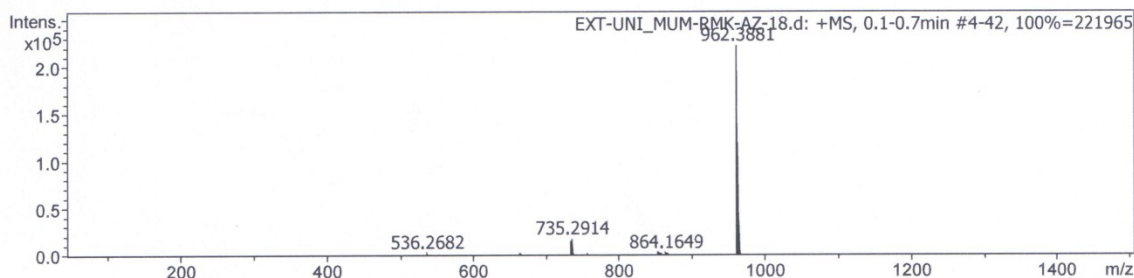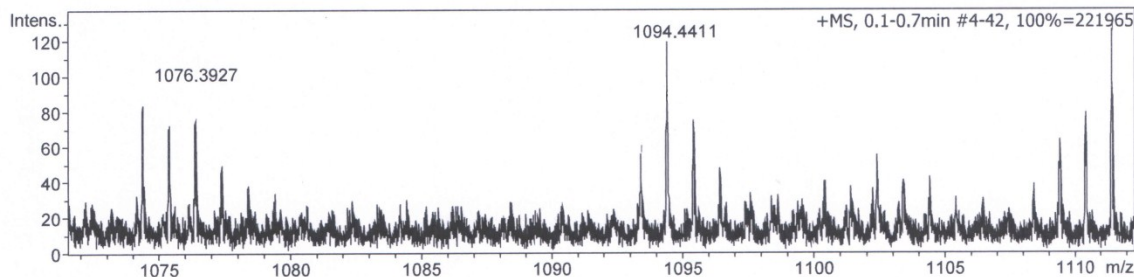

| Meas. m/z | # | Ion Formula | m/z       | err [ppm] | mSigma | # Sigma | Score | rdb  | e <sup>-</sup> Conf | N-Rule |
|-----------|---|-------------|-----------|-----------|--------|---------|-------|------|---------------------|--------|
| 1094.4411 | 1 | C74H52N11   | 1094.4323 | -5.2      | n.a.   | n.a.    | n.a.  | 55.0 | odd                 | ok     |

**Fig. S6** HRMS Spectra of compound **5**

# DEPARTMENT OF CHEMISTRY, I.I.T.(B)

## Analysis Info

Analysis Name D:\Data\JULY-2016\EXT-UNI\_MUM-RMK-AZ-19.d  
 Method Tune\_pos\_NAICSI-1500.m  
 Sample Name EXT-UNI\_MUM-RMK-AZ-19  
 Comment C32H33N5O3

Acquisition Date 8/1/2016 4:34:43 PM

Operator gkl-in  
 Instrument maXis impact 282001.00081

## Acquisition Parameter

|             |          |                       |            |                  |           |
|-------------|----------|-----------------------|------------|------------------|-----------|
| Source Type | ESI      | Ion Polarity          | Positive   | Set Nebulizer    | 0.3 Bar   |
| Focus       | Active   | Set Capillary         | 3700 V     | Set Dry Heater   | 180 °C    |
| Scan Begin  | 50 m/z   | Set End Plate Offset  | -500 V     | Set Dry Gas      | 4.0 l/min |
| Scan End    | 1500 m/z | Set Collision Cell RF | 1500.0 Vpp | Set Divert Valve | Source    |

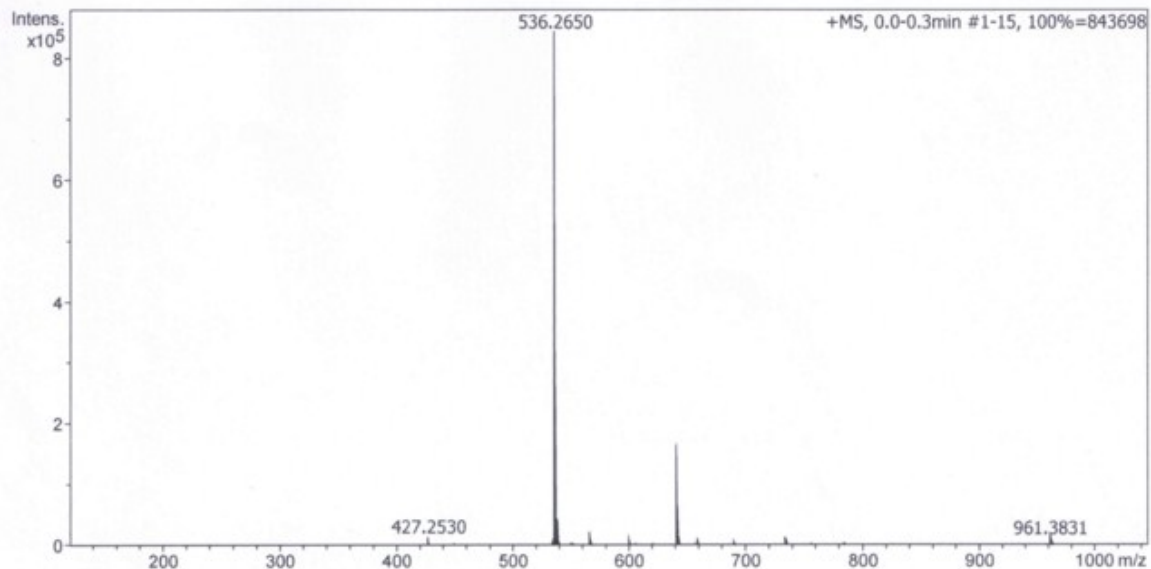

| Meas. m/z | # | Ion Formula | m/z      | err [ppm] | mSigma | # Sigma | Score  | rdb  | e <sup>-</sup> Conf | N-Rule |
|-----------|---|-------------|----------|-----------|--------|---------|--------|------|---------------------|--------|
| 536.2650  | 1 | C32H34N5O3  | 536.2656 | 1.1       | 32.4   | 1       | 100.00 | 18.5 | even                | ok     |

**Fig. S7** HRMS Spectra of compound **6**

## 8. FTIR Spectra of compounds 1-6

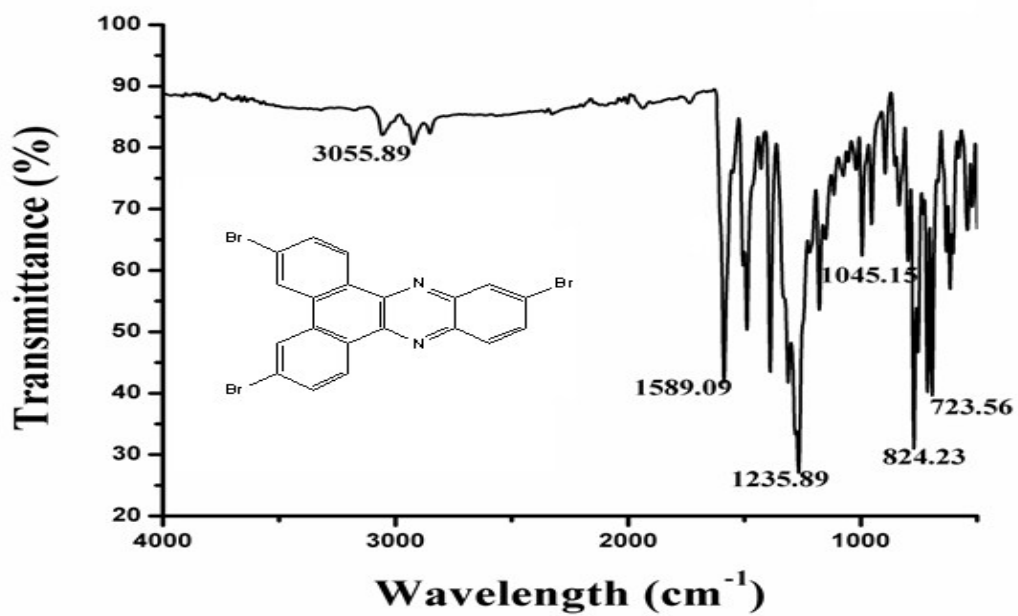

Fig. S8 FTIR Spectra of compound 1

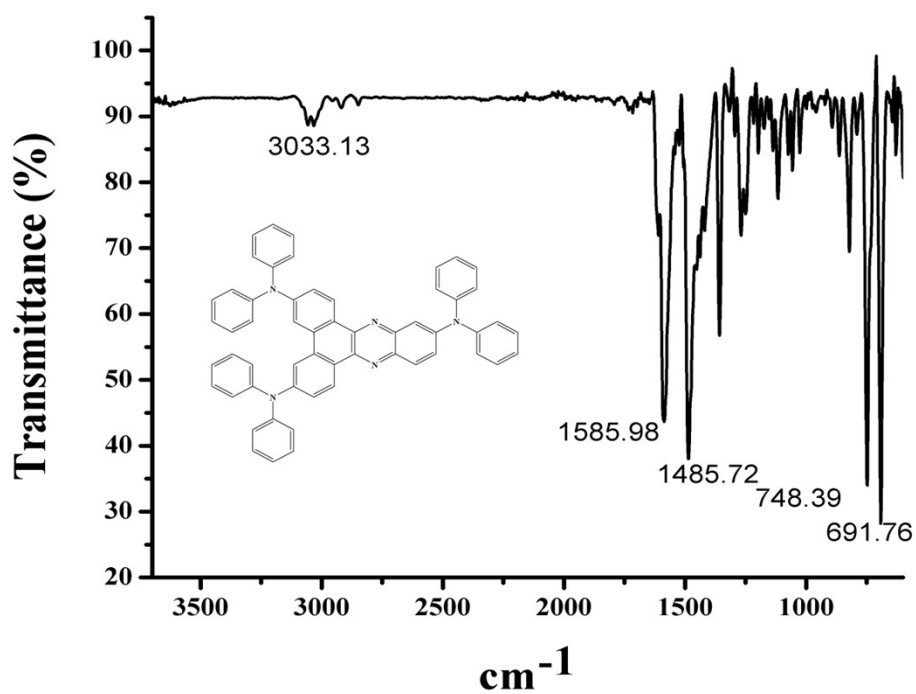

Fig. S9 FTIR Spectra of compound 2

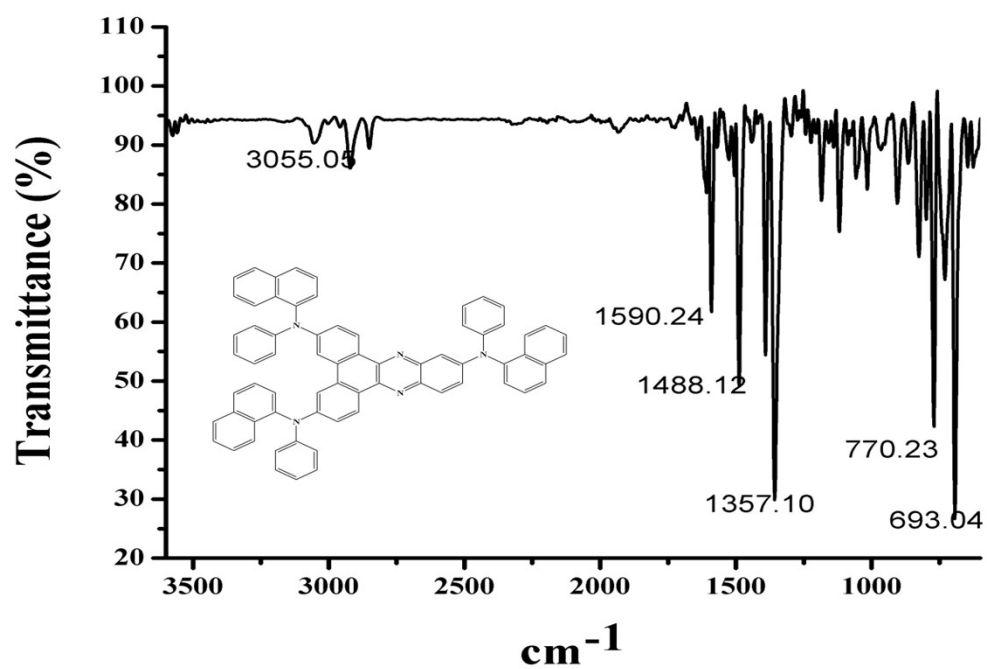

Fig. S10 FTIR Spectra of compound 3

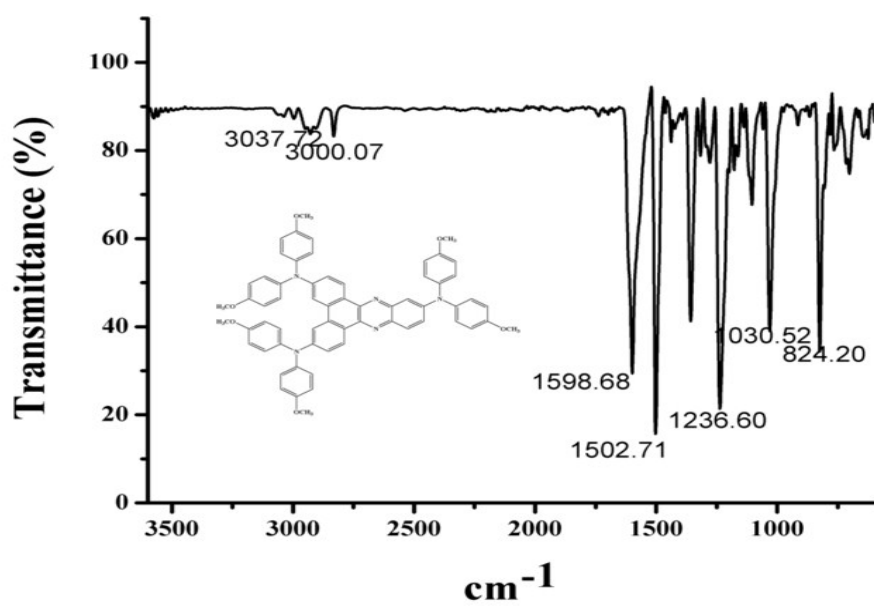

Fig. S11 FTIR Spectra of compound 4

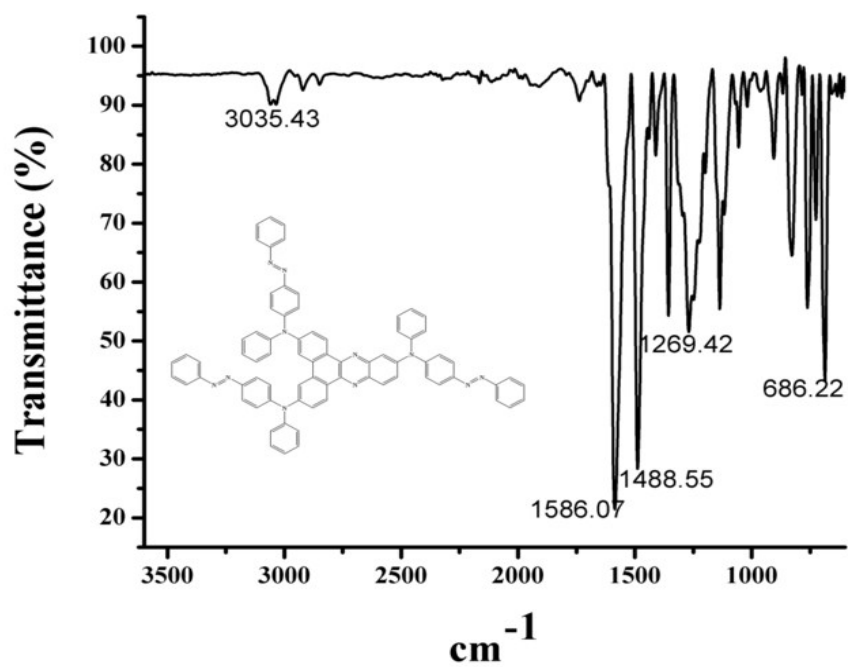

Fig. S12 FTIR Spectra of compound 5

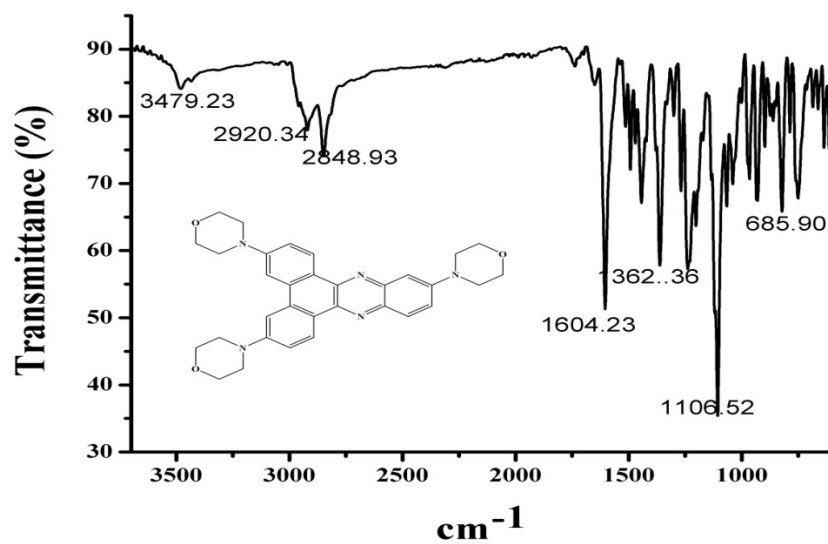

Fig. S13 FTIR Spectra of compound 6

## 9. $^1\text{H}$ and $^{13}\text{C}$ NMR spectra of compounds 1–6

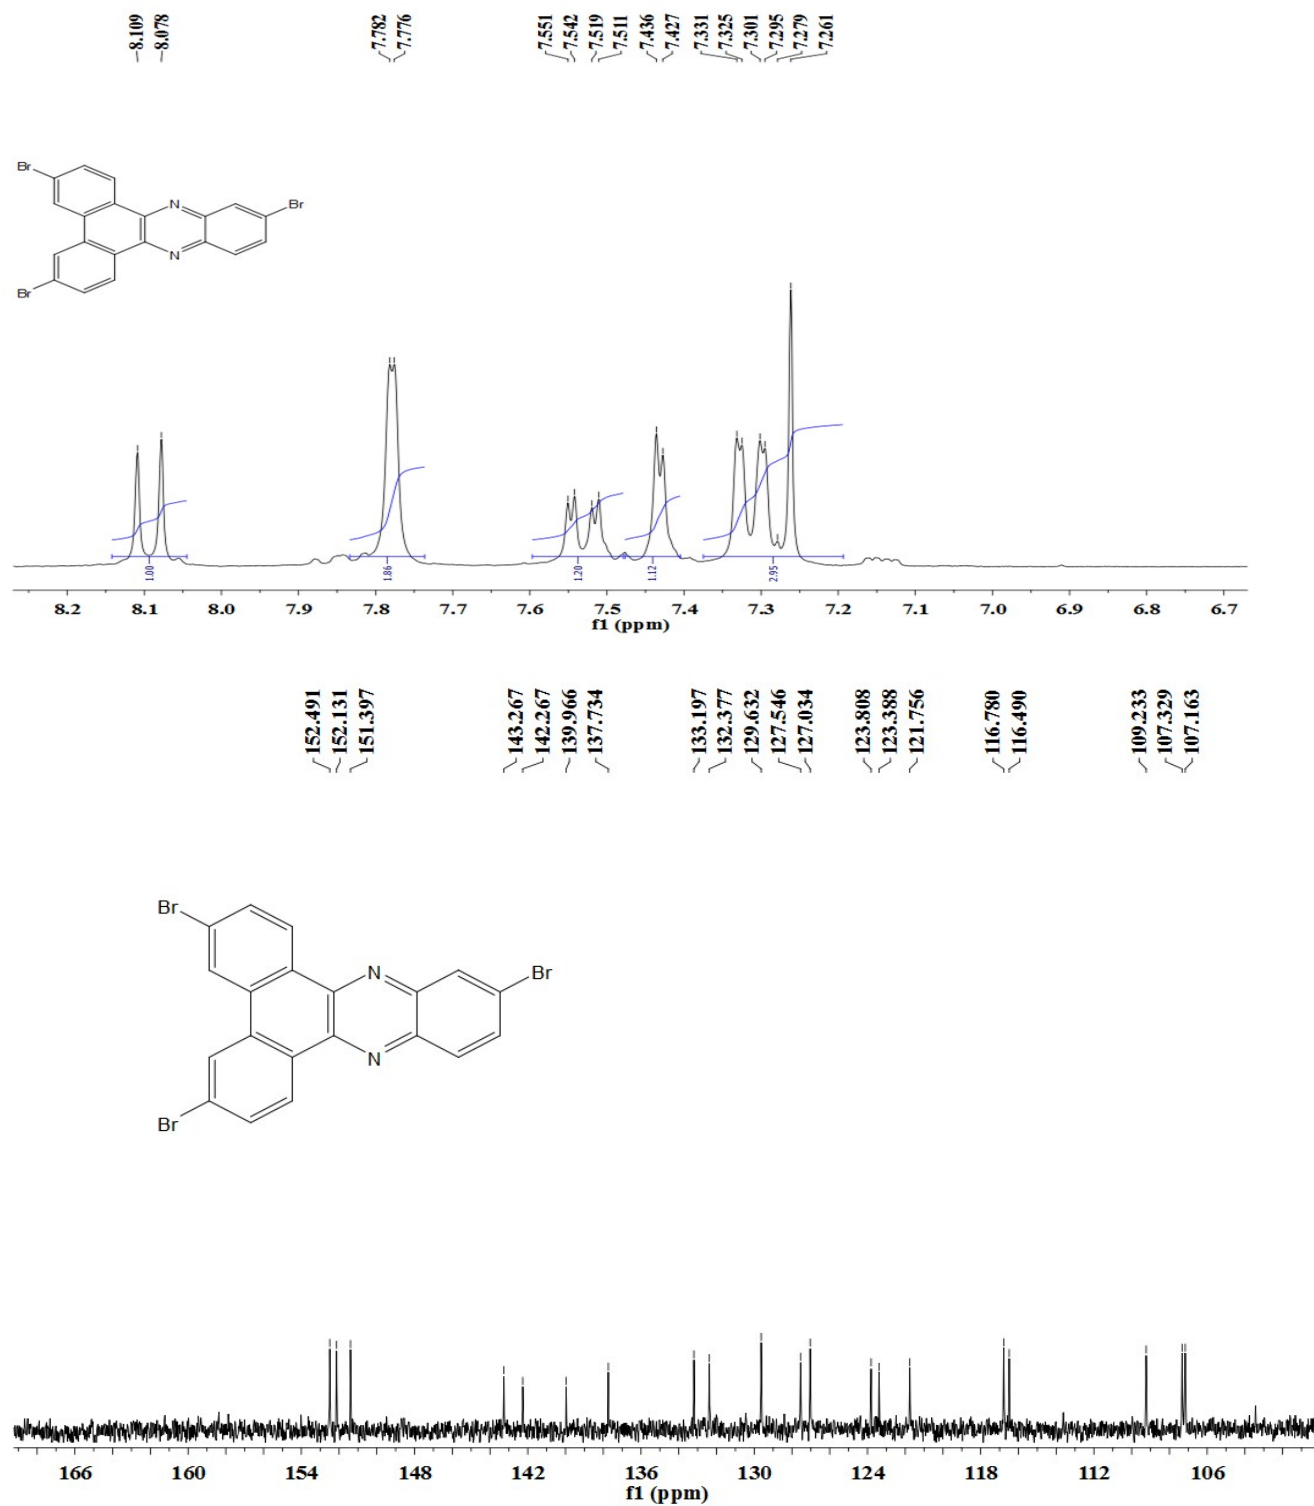

Fig. S14  $^1\text{H}$  and  $^{13}\text{C}$  NMR spectra of compound 1 in  $\text{CDCl}_3$ .

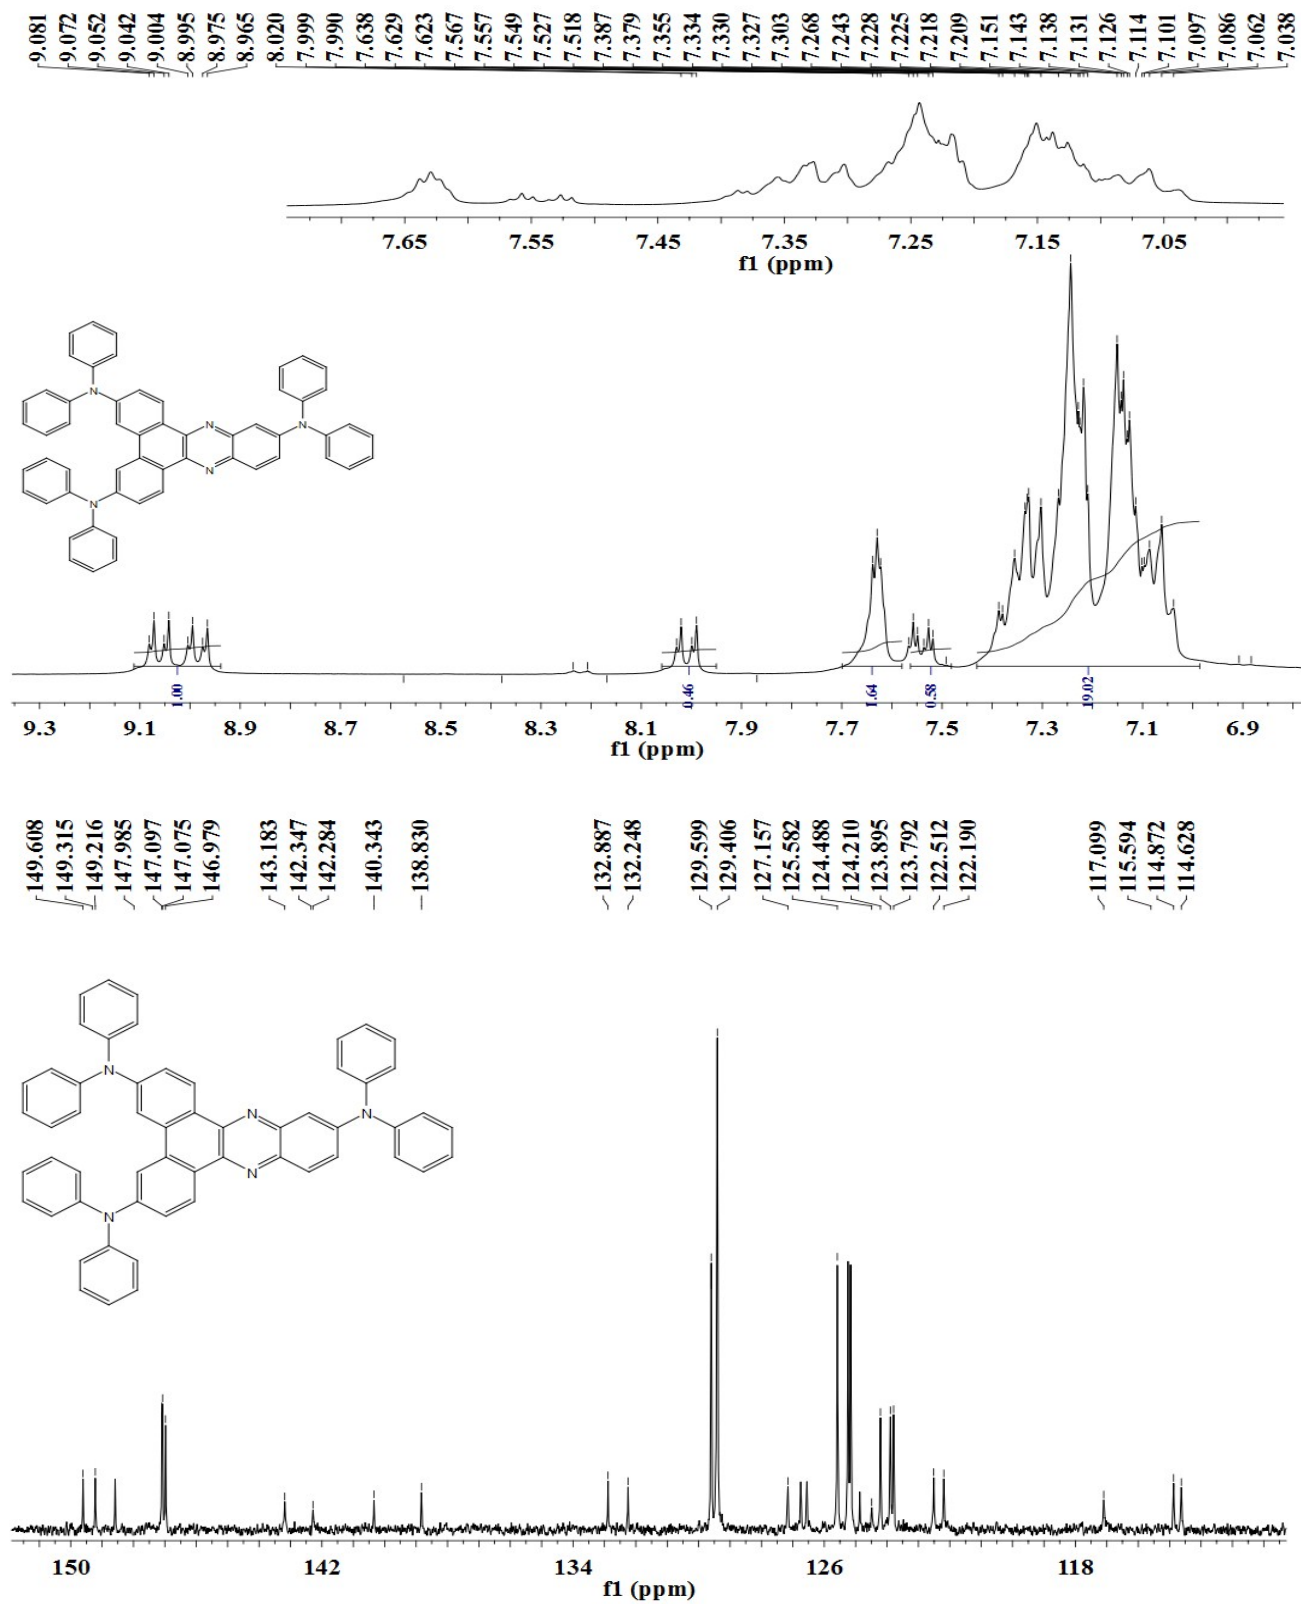

**Fig. S15** <sup>1</sup>H and <sup>13</sup>C NMR spectra of compound **2** in CDCl<sub>3</sub>.

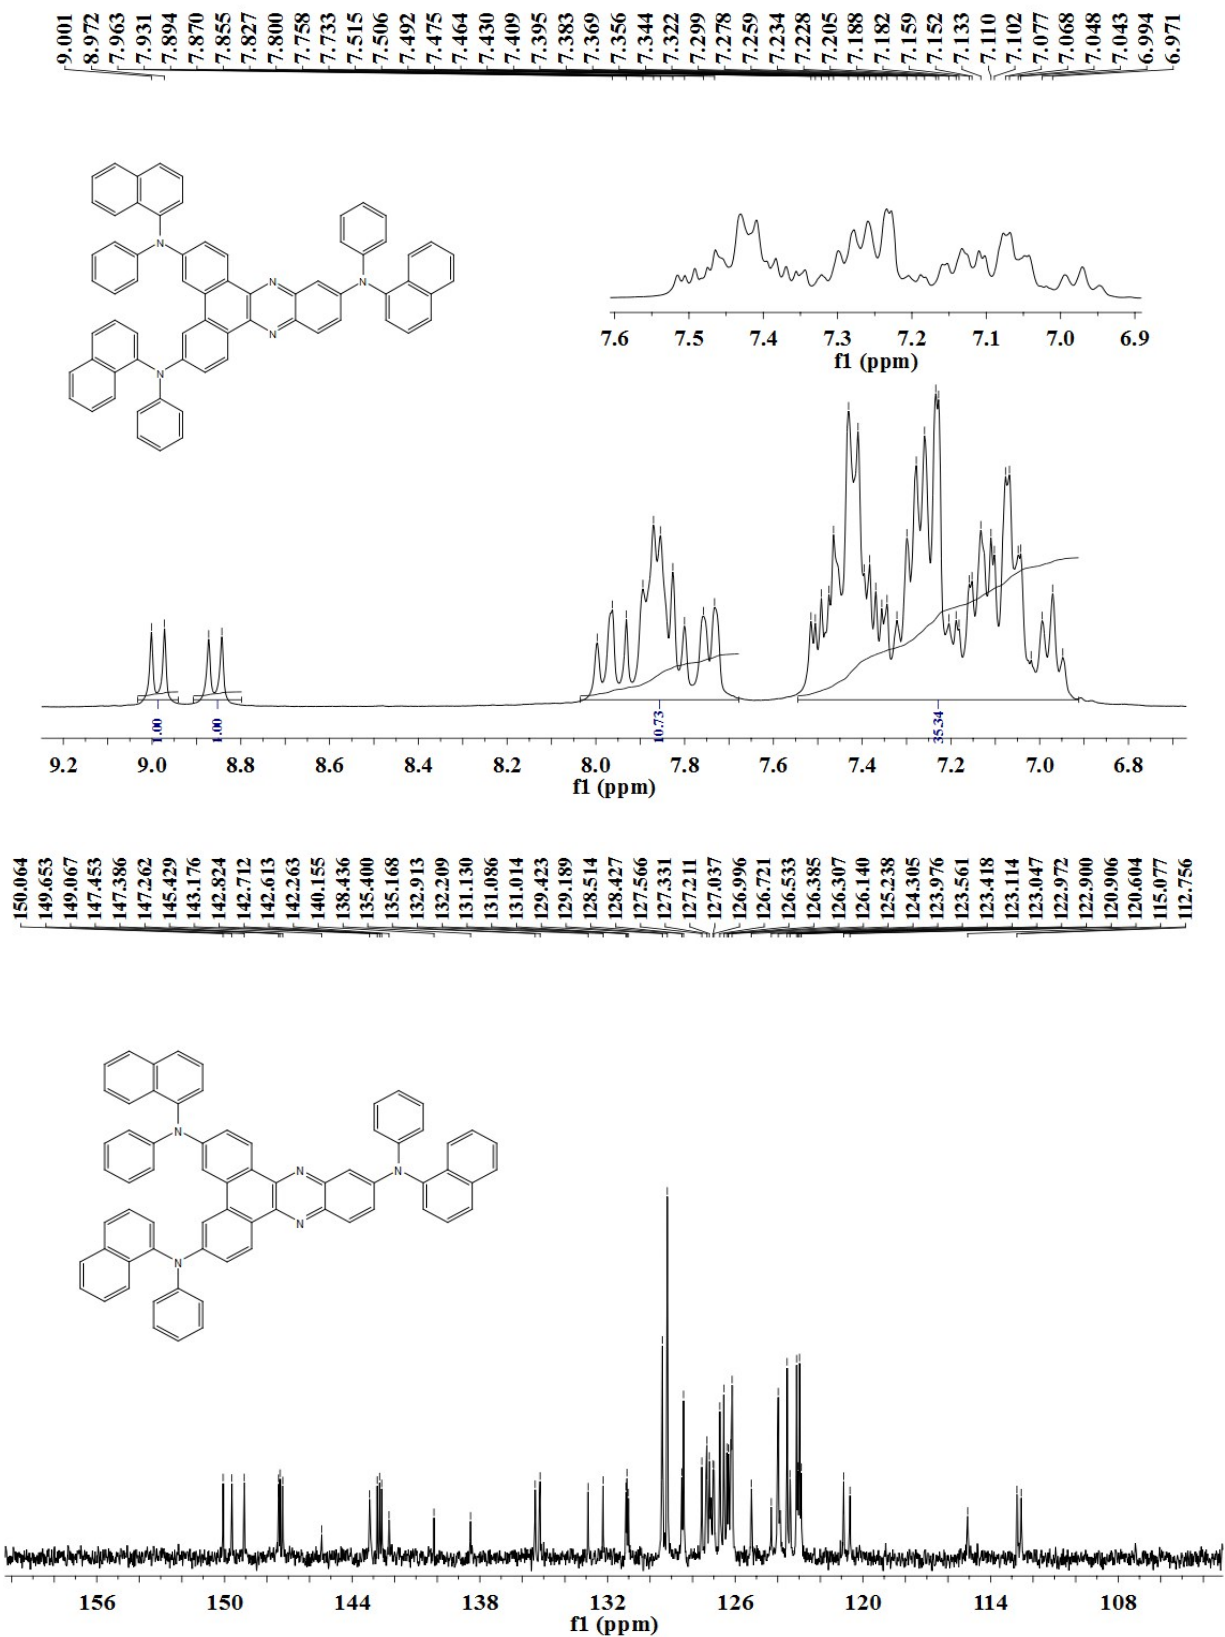

**Fig. S16**  $^1\text{H}$  and  $^{13}\text{C}$  NMR spectra of compound **3** in  $\text{CDCl}_3$ .



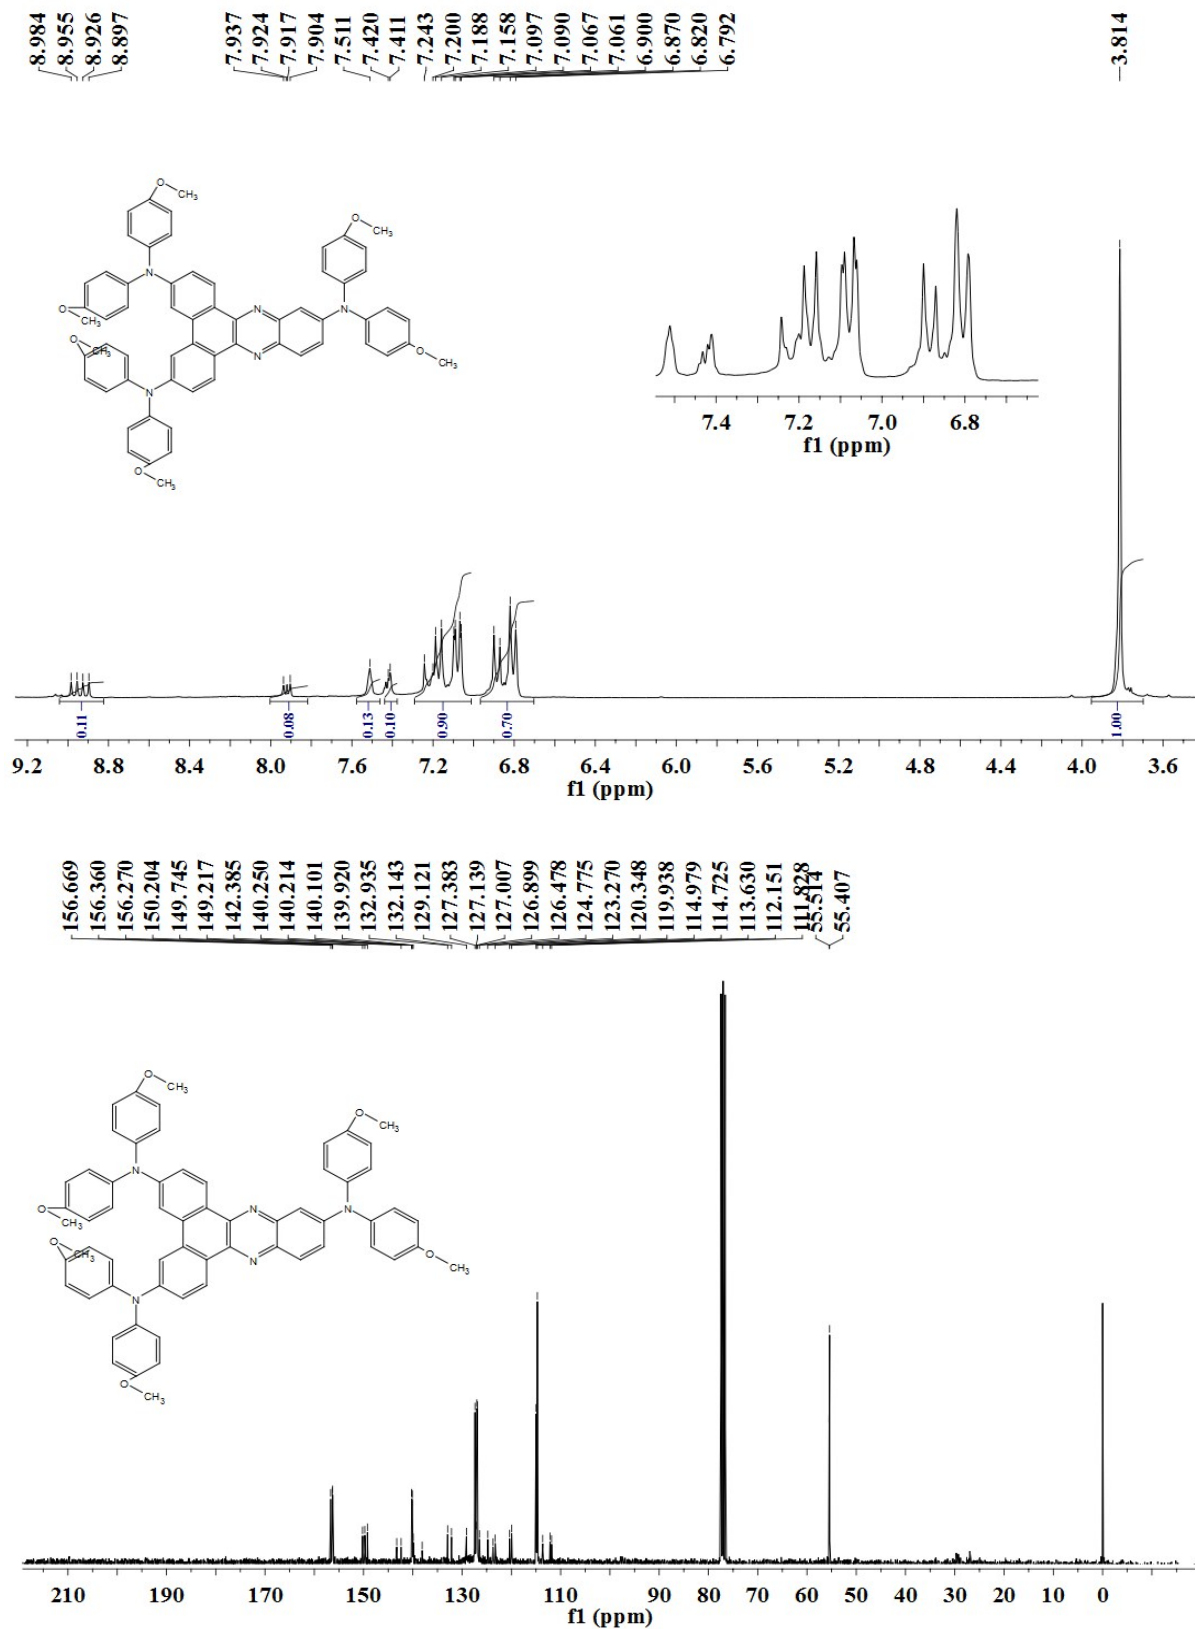

**Fig. S17** <sup>1</sup>H and <sup>13</sup>C NMR spectra of compound 4 in CDCl<sub>3</sub>.

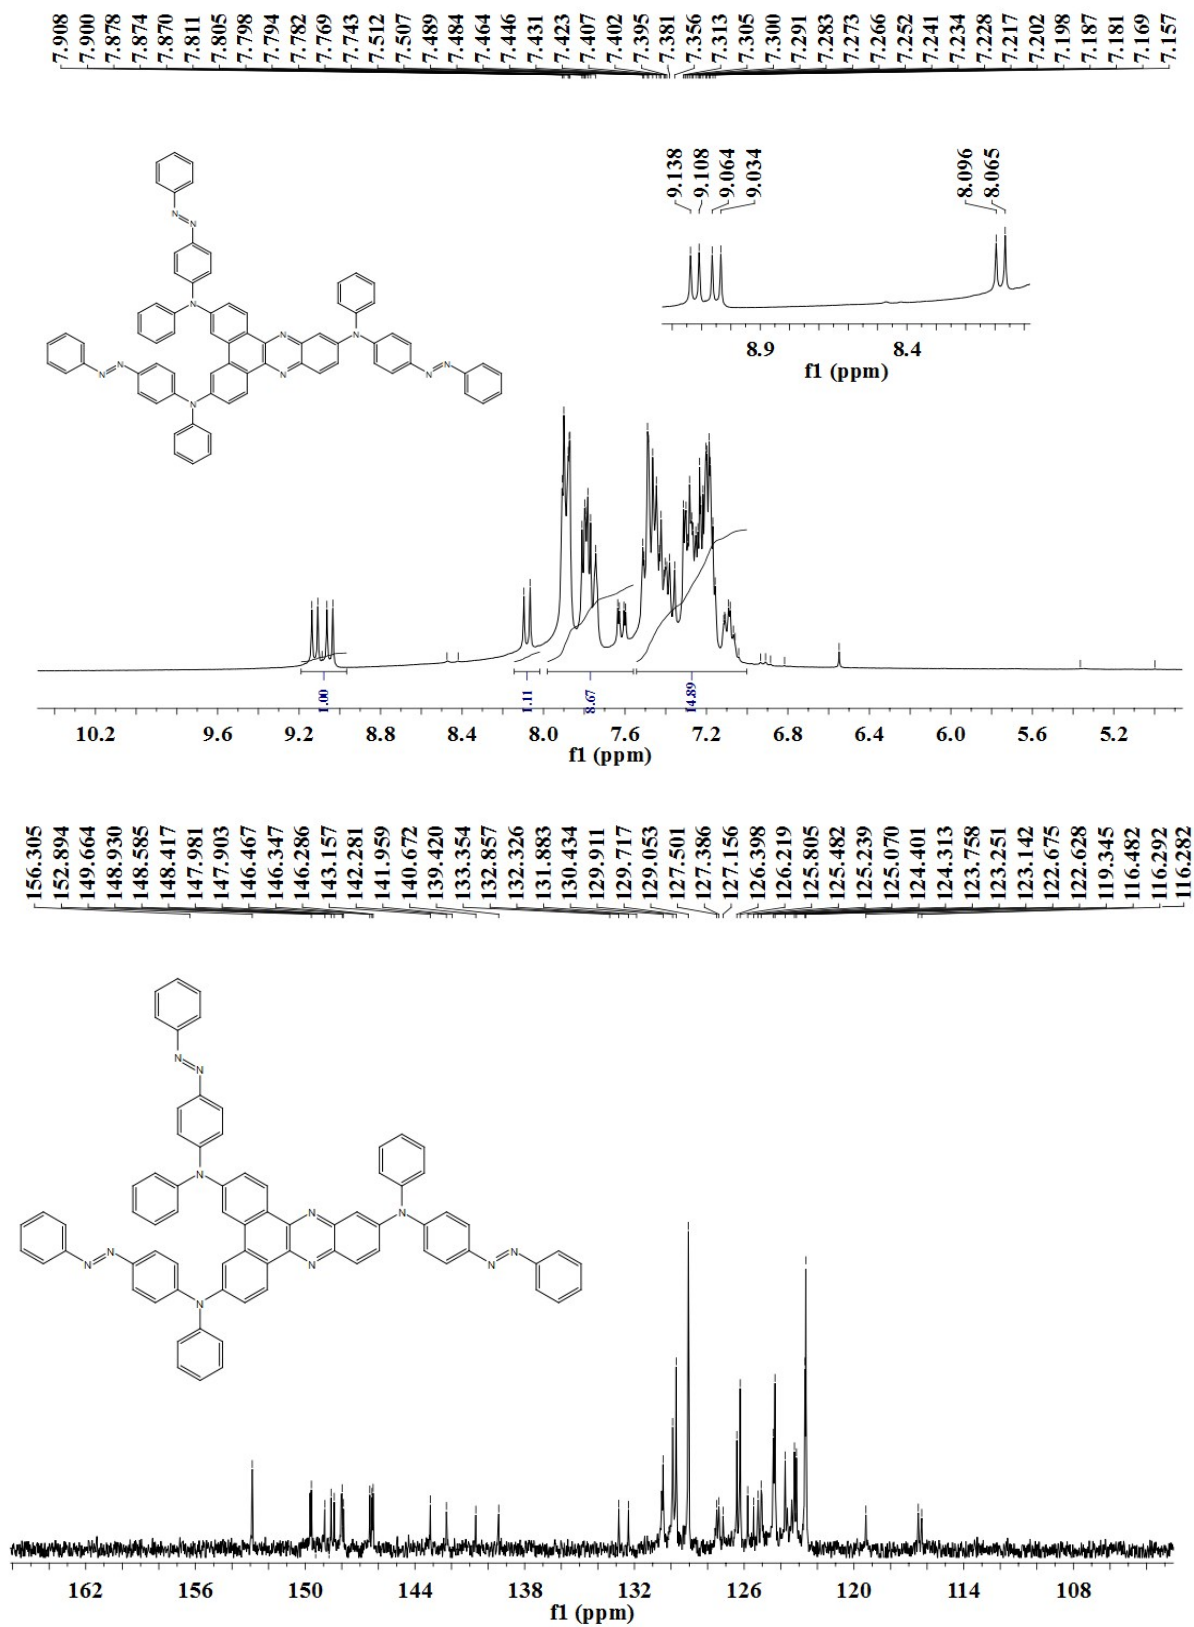

**Fig. S18** <sup>1</sup>H and <sup>13</sup>C NMR spectra of compound **5** in CDCl<sub>3</sub>.

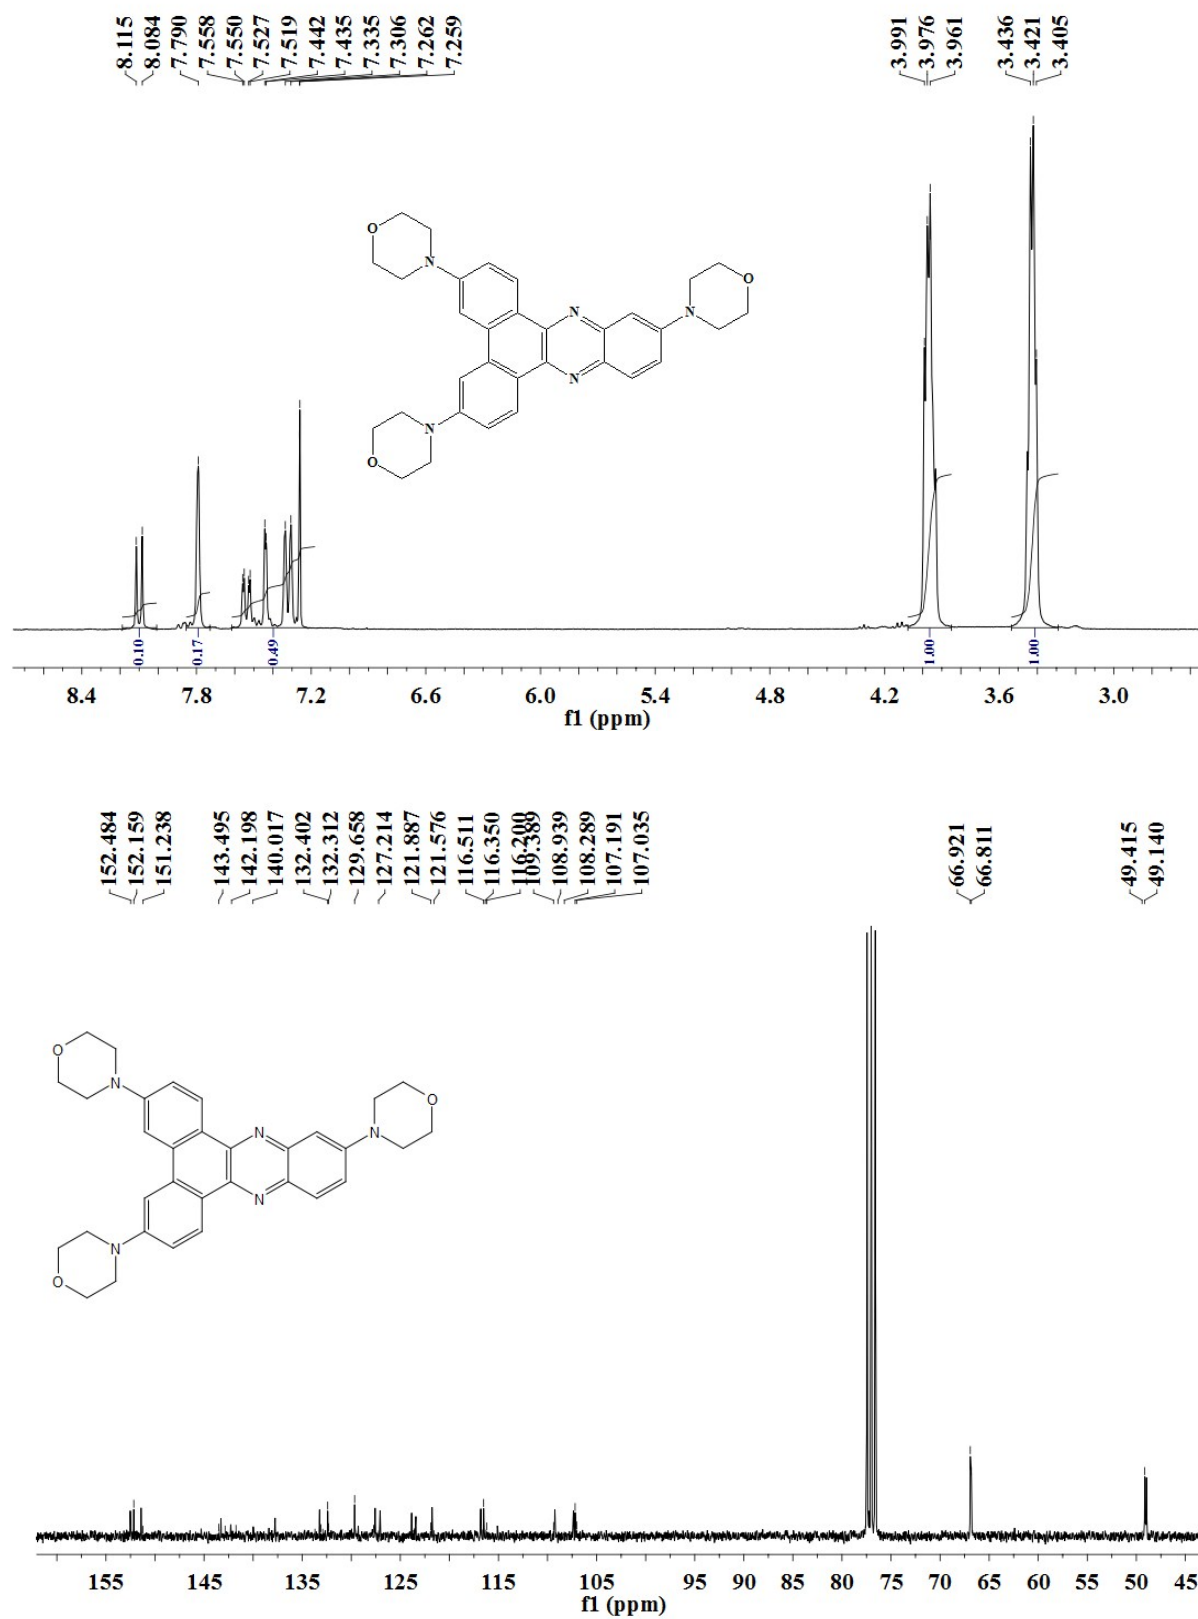

Fig. S19 <sup>1</sup>H and <sup>13</sup>C NMR spectra of compound 6 in CDCl<sub>3</sub>.

## 10. Optimized structures of compounds 2 6

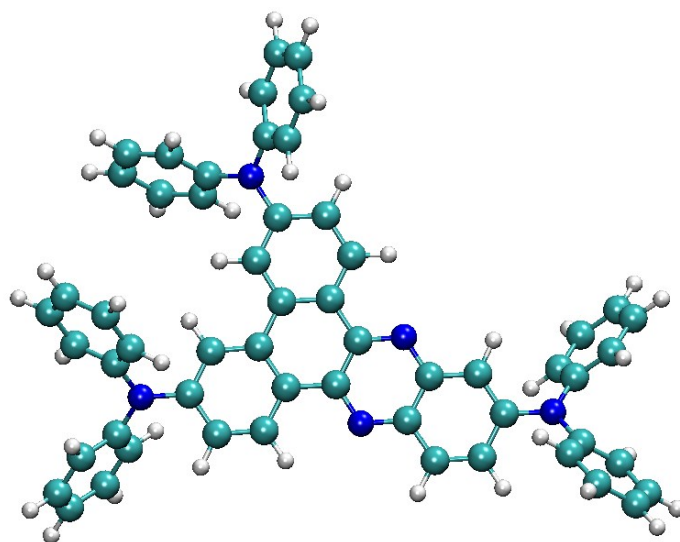

**Fig. S20** Optimized structure of compound 2

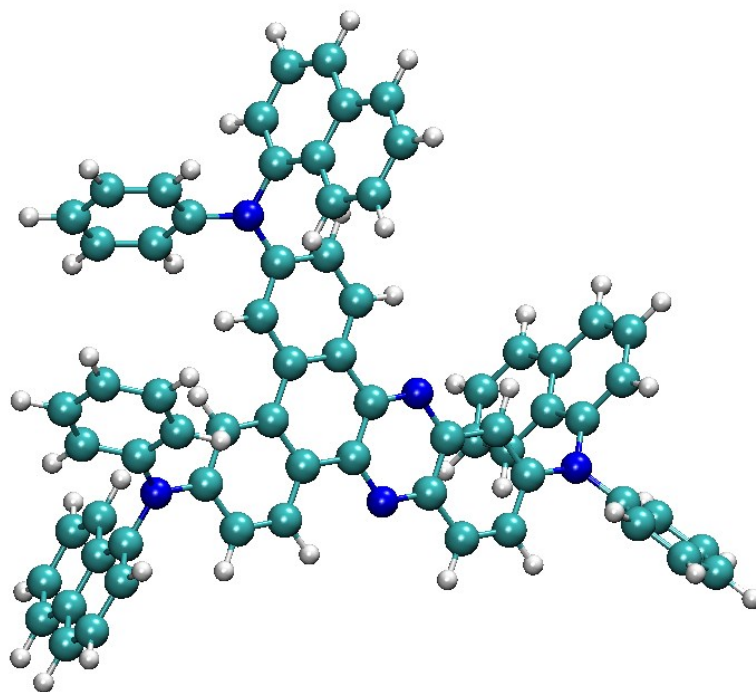

**Fig. S21** Optimized structure of compound 3

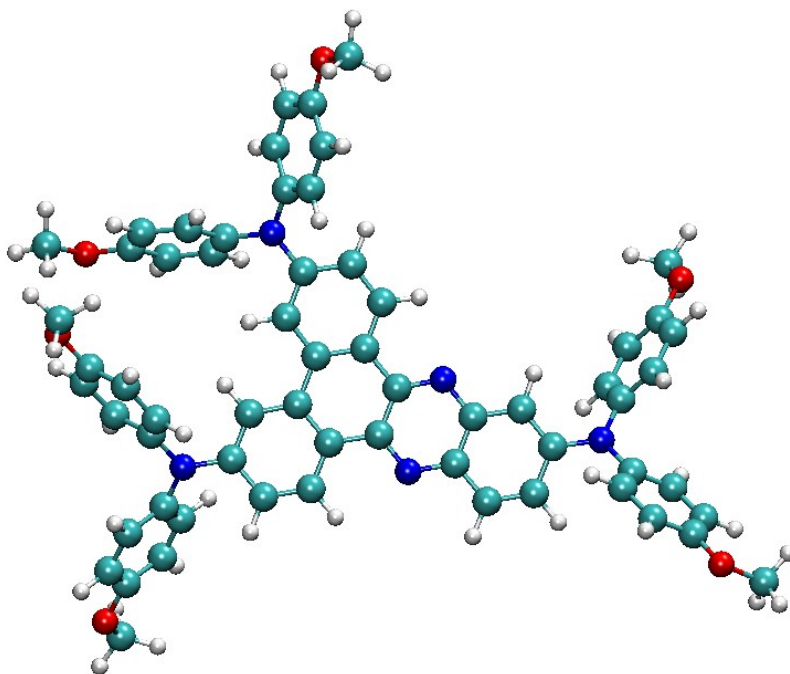

**Fig. S22** Optimized structure of compound 4

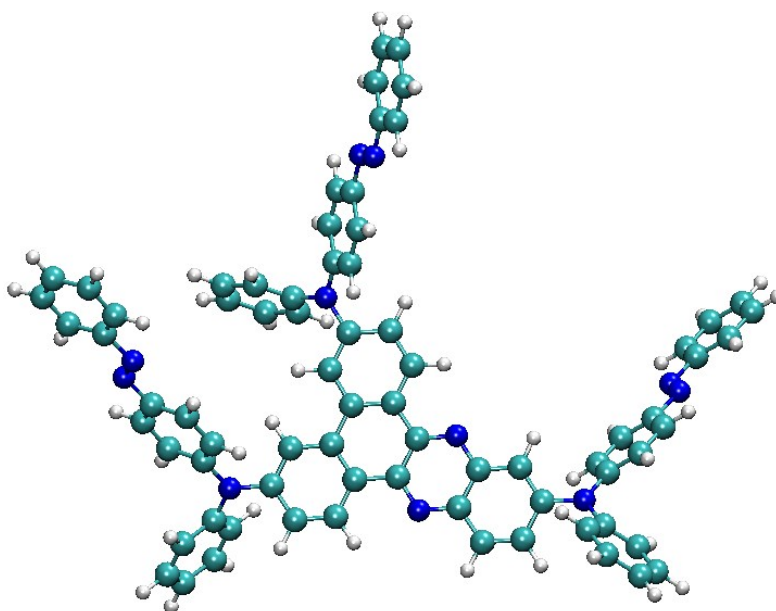

**Fig. S23** Optimized structure of compound 5

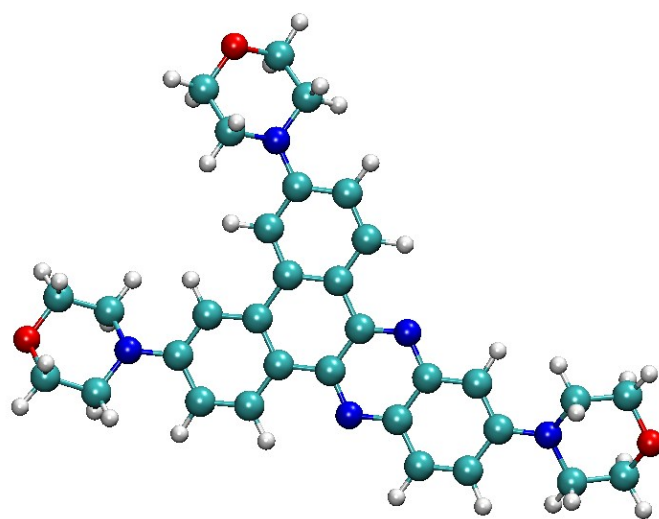

**Fig. S24** Optimized structure of compound **6**

## 11. Cartesian coordinates of compounds of 2 6

**Table S1.** Cartesian coordinates of optimized structure of compound 2

Total energy: 2431.16599750 Hartrees

| Atom | x         | y         | z        |
|------|-----------|-----------|----------|
| C    | -4.814272 | -2.107246 | 8.423454 |
| C    | -5.684190 | -1.159842 | 7.878440 |
| C    | -5.391159 | -0.484929 | 6.678601 |
| C    | -4.182520 | -0.802743 | 6.003337 |
| C    | -3.314402 | -1.765379 | 6.557487 |
| C    | -3.612009 | -2.405549 | 7.744711 |
| C    | -6.310248 | 0.518057  | 6.104183 |
| C    | -5.976261 | 1.160897  | 4.882474 |
| C    | -4.735182 | 0.836283  | 4.195166 |
| C    | -3.840772 | -0.140917 | 4.751937 |
| C    | -7.514408 | 0.872789  | 6.740854 |
| C    | -8.390410 | 1.811978  | 6.191345 |
| C    | -8.049078 | 2.434913  | 4.970510 |
| C    | -6.861927 | 2.114856  | 4.341030 |
| N    | -4.441472 | 1.458496  | 3.041531 |
| C    | -3.277819 | 1.142032  | 2.410602 |
| C    | -2.381221 | 0.172063  | 2.965358 |
| N    | -2.689565 | -0.456738 | 4.139258 |
| C    | -2.927853 | 1.774717  | 1.187310 |
| C    | -1.753995 | 1.459092  | 0.551433 |
| C    | -0.859418 | 0.478455  | 1.095287 |
| C    | -1.183340 | -0.151704 | 2.286089 |
| N    | -9.614602 | 2.131144  | 6.845023 |

|   |            |           |           |
|---|------------|-----------|-----------|
| N | -5.129690  | -2.758902 | 9.649525  |
| C | -5.785573  | -2.041124 | 10.701909 |
| C | -4.816227  | -4.143444 | 9.831965  |
| C | -10.356449 | 1.113624  | 7.528158  |
| C | -10.111316 | 3.473526  | 6.831406  |
| N | 0.353849   | 0.193547  | 0.412374  |
| C | -6.863351  | -2.619712 | 11.391054 |
| C | -7.489167  | -1.924668 | 12.426682 |
| C | -7.062257  | -0.641148 | 12.778927 |
| C | -5.994102  | -0.059933 | 12.088669 |
| C | -5.352316  | -0.754724 | 11.063118 |
| C | -4.279325  | -4.594352 | 11.049240 |
| C | -3.988792  | -5.946657 | 11.230994 |
| C | -4.211888  | -6.865479 | 10.200910 |
| C | -4.738969  | -6.417724 | 8.985958  |
| C | -5.048855  | -5.069750 | 8.801789  |
| C | 0.382444   | 0.141414  | -1.017616 |
| C | 1.541900   | -0.126190 | 1.150197  |
| C | -10.891415 | 1.360589  | 8.802589  |
| C | -11.625433 | 0.372420  | 9.459859  |
| C | -11.823524 | -0.877248 | 8.865712  |
| C | -11.286362 | -1.127324 | 7.599087  |
| C | -10.565639 | -0.139191 | 6.928209  |
| C | -11.475581 | 3.721958  | 6.607273  |
| C | -11.960200 | 5.030126  | 6.603026  |
| C | -11.093781 | 6.108625  | 6.805910  |
| C | -9.734451  | 5.864002  | 7.022726  |
| C | -9.244242  | 4.557811  | 7.045227  |
| C | 2.321670   | -1.236881 | 0.793335  |



|   |            |           |           |
|---|------------|-----------|-----------|
| C | 3.486890   | -1.533104 | 1.502653  |
| C | 3.880000   | -0.738343 | 2.582762  |
| C | 3.099673   | 0.364694  | 2.943944  |
| C | 1.942917   | 0.676588  | 2.229979  |
| C | 1.462238   | 0.697011  | -1.724089 |
| C | 1.494334   | 0.637471  | -3.117090 |
| C | 0.447891   | 0.039467  | -3.826718 |
| C | -0.629792  | -0.509290 | -3.126150 |
| C | -0.661637  | -0.469668 | -1.731356 |
| H | -6.603825  | -0.959120 | 8.403924  |
| H | -2.396594  | -1.977812 | 6.030192  |
| H | -2.926678  | -3.128239 | 8.162667  |
| H | -7.784448  | 0.420693  | 7.681492  |
| H | -8.723236  | 3.154999  | 4.530711  |
| H | -6.590727  | 2.579693  | 3.405158  |
| H | -3.605762  | 2.517014  | 0.790488  |
| H | -1.481605  | 1.957298  | -0.367250 |
| H | -0.538572  | -0.896711 | 2.726402  |
| H | -7.203628  | -3.606764 | 11.112247 |
| H | -8.319244  | -2.382133 | 12.948687 |
| H | -7.553617  | -0.102334 | 13.577577 |
| H | -5.650160  | 0.930459  | 12.356261 |
| H | -4.518011  | -0.309254 | 10.540231 |
| H | -4.093448  | -3.884655 | 11.842761 |
| H | -3.575684  | -6.279415 | 12.174134 |
| H | -3.978946  | -7.911999 | 10.342563 |
| H | -4.922730  | -7.119541 | 8.183132  |
| H | -5.471138  | -4.730346 | 7.866730  |
| H | -10.727924 | 2.321412  | 9.269485  |

|   |            |           |           |
|---|------------|-----------|-----------|
| H | -12.030479 | 0.576113  | 10.442320 |
| H | -12.387064 | -1.643421 | 9.380463  |
| H | -11.439460 | -2.087989 | 7.125259  |
| H | -10.164456 | -0.330314 | 5.943051  |
| H | -12.145024 | 2.891041  | 6.436289  |
| H | -13.013395 | 5.206331  | 6.428036  |
| H | -11.471340 | 7.121979  | 6.795422  |
| H | -9.054711  | 6.689539  | 7.187962  |
| H | -8.195399  | 4.371815  | 7.227445  |
| H | 2.012675   | -1.860284 | -0.033637 |
| H | 4.079198   | -2.392568 | 1.217678  |
| H | 4.779528   | -0.974078 | 3.134873  |
| H | 3.397229   | 0.990591  | 3.774784  |
| H | 1.347161   | 1.535690  | 2.503734  |
| H | 2.265501   | 1.171238  | -1.178491 |
| H | 2.331884   | 1.069672  | -3.648580 |
| H | 0.473153   | 0.001013  | -4.907158 |
| H | -1.441284  | -0.982561 | -3.663024 |
| H | -1.486540  | -0.913085 | -1.192073 |

**Table S2.** Cartesian coordinates of optimized structure of compound **3**

Total energy: 2892.07198924 Hartrees

| Atom | x        | y        | z         |
|------|----------|----------|-----------|
| C    | 8.057408 | 1.622258 | -9.850136 |
| C    | 7.763365 | 2.974152 | -9.639952 |
| C    | 7.033945 | 3.410651 | -8.519179 |
| C    | 6.612298 | 2.443985 | -7.566805 |
| C    | 6.922300 | 1.086914 | -7.781570 |

|   |           |           |            |
|---|-----------|-----------|------------|
| C | 7.624248  | 0.673827  | -8.897593  |
| C | 6.715334  | 4.837624  | -8.304674  |
| C | 5.989179  | 5.229743  | -7.147792  |
| C | 5.567624  | 4.237375  | -6.170074  |
| C | 5.873218  | 2.849237  | -6.379365  |
| C | 7.095581  | 5.829821  | -9.226316  |
| C | 6.799849  | 7.181798  | -9.021511  |
| C | 6.077257  | 7.554685  | -7.867242  |
| C | 5.682152  | 6.591323  | -6.958627  |
| N | 4.895400  | 4.635832  | -5.077636  |
| C | 4.511324  | 3.694914  | -4.172532  |
| C | 4.807248  | 2.309423  | -4.381157  |
| N | 5.492365  | 1.913799  | -5.495666  |
| C | 3.801891  | 4.072675  | -3.000382  |
| C | 3.414187  | 3.127257  | -2.085681  |
| C | 3.723886  | 1.739369  | -2.281038  |
| C | 4.408085  | 1.349537  | -3.420776  |
| N | 7.193010  | 8.164482  | -9.970076  |
| N | 8.804047  | 1.206972  | -10.984732 |
| C | 9.572033  | -0.011466 | -10.931727 |
| C | 8.703781  | 1.885979  | -12.242259 |
| C | 6.434360  | 9.383272  | -10.095523 |
| C | 8.410937  | 8.046796  | -10.713924 |
| N | 3.271910  | 0.786999  | -1.329642  |
| C | 9.221675  | -1.071287 | -11.747427 |
| C | 9.956032  | -2.279094 | -11.726413 |
| C | 11.029330 | -2.424566 | -10.876343 |
| C | 11.430368 | -1.357177 | -10.026217 |
| C | 10.704566 | -0.116320 | -10.057677 |

|   |           |           |            |
|---|-----------|-----------|------------|
| C | 9.852745  | 2.068382  | -13.028931 |
| C | 9.762990  | 2.698970  | -14.270214 |
| C | 8.533216  | 3.168394  | -14.740146 |
| C | 7.388140  | 2.989742  | -13.958202 |
| C | 7.466022  | 2.345886  | -12.722686 |
| C | 3.020003  | -0.570685 | -1.745308  |
| C | 3.269989  | 1.079299  | 0.071036   |
| C | 7.021378  | 10.587723 | -9.754820  |
| C | 6.309795  | 11.803424 | -9.875192  |
| C | 5.007856  | 11.804862 | -10.323190 |
| C | 4.367045  | 10.589841 | -10.692086 |
| C | 5.089757  | 9.350722  | -10.593720 |
| C | 8.451343  | 8.457082  | -12.056780 |
| C | 9.639365  | 8.373682  | -12.783218 |
| C | 10.800335 | 7.869881  | -12.190060 |
| C | 10.762731 | 7.459556  | -10.854076 |
| C | 9.583002  | 7.553851  | -10.115205 |
| C | 2.253286  | 0.560695  | 0.890902   |
| C | 2.252364  | 0.822745  | 2.260447   |
| C | 3.252919  | 1.614462  | 2.833443   |
| C | 4.264470  | 2.132331  | 2.020278   |
| C | 4.283423  | 1.860935  | 0.651077   |
| C | 3.833891  | -1.587794 | -1.284122  |
| C | 3.606210  | -2.929933 | -1.666783  |
| C | 2.572266  | -3.242657 | -2.520155  |
| C | 1.705661  | -2.227640 | -3.012404  |
| C | 1.916659  | -0.863043 | -2.613392  |
| C | 3.029921  | 10.568780 | -11.179839 |
| C | 2.434440  | 9.389590  | -11.567308 |

|   |           |           |            |
|---|-----------|-----------|------------|
| C | 3.155105  | 8.172057  | -11.490244 |
| C | 4.448514  | 8.152241  | -11.015207 |
| C | 12.550529 | -1.476146 | -9.155894  |
| C | 12.950058 | -0.422411 | -8.365241  |
| C | 12.248320 | 0.807489  | -8.414551  |
| C | 11.153663 | 0.956921  | -9.238162  |
| C | 0.616545  | -2.529751 | -3.877721  |
| C | -0.233810 | -1.541459 | -4.319800  |
| C | -0.036745 | -0.199881 | -3.909081  |
| C | 1.011638  | 0.131178  | -3.078343  |
| H | 8.121169  | 3.688835  | -10.362973 |
| H | 6.584741  | 0.371612  | -7.046780  |
| H | 7.841525  | -0.373199 | -9.047275  |
| H | 7.624488  | 5.558343  | -10.125477 |
| H | 5.839126  | 8.594092  | -7.696944  |
| H | 5.133012  | 6.864858  | -6.070265  |
| H | 3.568893  | 5.119580  | -2.866721  |
| H | 2.857768  | 3.418187  | -1.206987  |
| H | 4.654676  | 0.315725  | -3.607133  |
| H | 8.369824  | -0.967548 | -12.404944 |
| H | 9.657310  | -3.092000 | -12.374512 |
| H | 11.587448 | -3.351845 | -10.847657 |
| H | 10.806698 | 1.715352  | -12.663736 |
| H | 10.657426 | 2.832804  | -14.864232 |
| H | 8.467624  | 3.663804  | -15.699179 |
| H | 6.428175  | 3.338958  | -14.315251 |
| H | 6.574766  | 2.195876  | -12.130506 |
| H | 8.038815  | 10.590159 | -9.389365  |
| H | 6.794321  | 12.730361 | -9.599273  |

|   |           |           |            |
|---|-----------|-----------|------------|
| H | 4.455193  | 12.732150 | -10.406330 |
| H | 7.553256  | 8.837540  | -12.522225 |
| H | 9.653070  | 8.692867  | -13.817051 |
| H | 11.718029 | 7.798967  | -12.757742 |
| H | 11.657003 | 7.077870  | -10.379051 |
| H | 9.565783  | 7.249986  | -9.078493  |
| H | 1.471784  | -0.041489 | 0.449804   |
| H | 1.462365  | 0.416568  | 2.878295   |
| H | 3.245359  | 1.821264  | 3.894871   |
| H | 5.051786  | 2.736177  | 2.452095   |
| H | 5.081913  | 2.245311  | 0.032898   |
| H | 4.655467  | -1.345488 | -0.624542  |
| H | 4.260731  | -3.705675 | -1.292871  |
| H | 2.400953  | -4.267253 | -2.825127  |
| H | 2.488351  | 11.504319 | -11.244700 |
| H | 1.417440  | 9.388133  | -11.936316 |
| H | 2.683790  | 7.251446  | -11.807576 |
| H | 4.991486  | 7.220957  | -10.960576 |
| H | 13.088701 | -2.415580 | -9.131000  |
| H | 13.803502 | -0.526823 | -7.708604  |
| H | 12.576291 | 1.634706  | -7.799362  |
| H | 10.624594 | 1.897177  | -9.270414  |
| H | 0.466461  | -3.558553 | -4.180647  |
| H | -1.057516 | -1.785251 | -4.977426  |
| H | -0.716455 | 0.568993  | -4.251369  |
| H | 1.154608  | 1.154693  | -2.766706  |

**Table S3.** Cartesian coordinates of optimized structure of compound **4**

Total energy: 3118.25066717 Hartrees

| Atom | x         | y         | z         |
|------|-----------|-----------|-----------|
| C    | -1.784548 | 0.021110  | -7.919493 |
| C    | -2.475143 | 1.238207  | -7.891907 |
| C    | -2.350048 | 2.143370  | -6.822584 |
| C    | -1.464059 | 1.822900  | -5.760695 |
| C    | -0.780191 | 0.589833  | -5.789286 |
| C    | -0.937499 | -0.301719 | -6.831810 |
| C    | -3.100609 | 3.414412  | -6.791397 |
| C    | -2.887746 | 4.332342  | -5.729369 |
| C    | -1.953969 | 4.015375  | -4.659383 |
| C    | -1.256493 | 2.757393  | -4.664767 |
| C    | -4.051230 | 3.735106  | -7.777673 |
| C    | -4.763196 | 4.938032  | -7.756670 |
| C    | -4.514456 | 5.857682  | -6.711486 |
| C    | -3.602142 | 5.548425  | -5.721333 |
| N    | -1.764408 | 4.901680  | -3.667962 |
| C    | -0.897089 | 4.582758  | -2.668426 |
| C    | -0.206221 | 3.327704  | -2.665529 |
| N    | -0.404422 | 2.431949  | -3.680060 |
| C    | -0.664711 | 5.490053  | -1.600207 |
| C    | 0.205136  | 5.169755  | -0.588715 |
| C    | 0.912530  | 3.920826  | -0.587939 |
| C    | 0.698747  | 3.021874  | -1.623305 |
| N    | -5.718240 | 5.231689  | -8.765824 |
| N    | -1.937259 | -0.871599 | -9.008135 |
| C    | -3.114298 | -0.817980 | -9.833368 |

|   |           |           |            |
|---|-----------|-----------|------------|
| C | -0.885837 | -1.769184 | -9.390639  |
| C | -5.571963 | 4.680394  | -10.082648 |
| C | -6.900382 | 5.983834  | -8.464178  |
| N | 1.795549  | 3.625820  | 0.480672   |
| C | -3.005242 | -0.611392 | -11.211809 |
| C | -4.143126 | -0.560455 | -12.023209 |
| C | -5.409401 | -0.701428 | -11.447520 |
| C | -5.528681 | -0.912537 | -10.066399 |
| C | -4.392385 | -0.978472 | -9.269545  |
| C | 0.439933  | -1.332347 | -9.498943  |
| C | 1.457312  | -2.212147 | -9.883077  |
| C | 1.145421  | -3.540094 | -10.188447 |
| C | -0.180272 | -3.983689 | -10.097954 |
| C | -1.182491 | -3.110281 | -9.695184  |
| C | 2.547485  | 4.668061  | 1.115821   |
| C | 2.025945  | 2.266940  | 0.884500   |
| C | -4.387777 | 4.865737  | -10.805226 |
| C | -4.230505 | 4.310306  | -12.078378 |
| C | -5.277294 | 3.578278  | -12.646292 |
| C | -6.472720 | 3.401336  | -11.940609 |
| C | -6.615175 | 3.942177  | -10.668021 |
| C | -7.343400 | 6.988919  | -9.343570  |
| C | -8.500129 | 7.708767  | -9.071610  |
| C | -9.231006 | 7.452046  | -7.904593  |
| C | -8.800496 | 6.460427  | -7.018418  |
| C | -7.647407 | 5.724566  | -7.308519  |
| C | 0.953070  | 1.416141  | 1.173119   |
| C | 1.172333  | 0.091831  | 1.562728   |
| C | 2.481223  | -0.384585 | 1.688532   |



|   |            |           |            |
|---|------------|-----------|------------|
| C | 3.561957   | 0.463270  | 1.416096   |
| C | 3.336148   | 1.772836  | 1.009318   |
| C | 2.656038   | 4.715453  | 2.510622   |
| C | 3.409130   | 5.711650  | 3.139249   |
| C | 4.047858   | 6.687377  | 2.367783   |
| C | 3.940537   | 6.653228  | 0.971662   |
| C | 3.208425   | 5.647925  | 0.351867   |
| O | -10.368620 | 8.238249  | -7.720569  |
| O | -5.221122  | 2.972732  | -13.907369 |
| O | 2.074345   | -4.499302 | -10.591980 |
| O | 2.816549   | -1.681017 | 2.077216   |
| O | 4.815389   | 7.729635  | 2.886788   |
| H | -3.108061  | 1.480063  | -8.729332  |
| H | -0.129472  | 0.357232  | -4.959537  |
| H | -0.415505  | -1.246706 | -6.820789  |
| H | -4.262418  | 3.036204  | -8.570118  |
| H | -5.041617  | 6.800028  | -6.691673  |
| H | -3.408129  | 6.240320  | -4.915389  |
| H | -1.205868  | 6.425711  | -1.605821  |
| H | 0.360522   | 5.855543  | 0.230758   |
| H | 1.210993   | 2.073117  | -1.664044  |
| H | -2.025643  | -0.490094 | -11.653019 |
| H | -4.030349  | -0.395504 | -13.083874 |
| H | -6.517649  | -1.028967 | -9.647712  |
| H | -4.484925  | -1.146958 | -8.205731  |
| H | 0.681647   | -0.302500 | -9.277420  |
| H | 2.470783   | -1.846034 | -9.951093  |
| H | -0.395169  | -5.015378 | -10.335526 |
| H | -2.202807  | -3.457642 | -9.615842  |

|   |            |           |            |
|---|------------|-----------|------------|
| H | -3.582309  | 5.437339  | -10.366058 |
| H | -3.301999  | 4.461671  | -12.607917 |
| H | -7.266856  | 2.827254  | -12.394489 |
| H | -7.532780  | 3.792138  | -10.117257 |
| H | -6.775122  | 7.197766  | -10.238865 |
| H | -8.850895  | 8.482346  | -9.739126  |
| H | -9.350882  | 6.240397  | -6.116013  |
| H | -7.326302  | 4.948209  | -6.628717  |
| H | -0.058190  | 1.787048  | 1.084129   |
| H | 0.324381   | -0.542934 | 1.771620   |
| H | 4.563040   | 0.069706  | 1.515570   |
| H | 4.171658   | 2.421313  | 0.786944   |
| H | 2.153026   | 3.967693  | 3.107345   |
| H | 3.477326   | 5.718740  | 4.216767   |
| H | 4.451449   | 7.412010  | 0.397047   |
| H | 3.145274   | 5.614110  | -0.726500  |
| C | 4.974045   | 7.836011  | 4.325304   |
| C | -11.182849 | 8.027414  | -6.538066  |
| C | 3.469464   | -4.119083 | -10.711837 |
| H | 5.601347   | 8.707975  | 4.477409   |
| H | 4.011911   | 7.985246  | 4.820949   |
| H | 5.467830   | 6.952485  | 4.736846   |
| H | -11.990646 | 8.747211  | -6.618100  |
| H | -11.594099 | 7.015456  | -6.514318  |
| H | -10.613324 | 8.215089  | -5.624686  |
| H | 3.982590   | -5.020527 | -11.029927 |
| H | 3.604921   | -3.336050 | -11.461789 |
| H | 3.874359   | -3.785368 | -9.753493  |
| O | -6.606777  | -0.649738 | -12.154503 |

|   |           |           |            |
|---|-----------|-----------|------------|
| C | -6.566903 | -0.401450 | -13.588974 |
| C | -4.046150 | 3.189806  | -14.733439 |
| C | 1.752714  | -2.628569 | 2.354491   |
| H | -7.605951 | -0.405197 | -13.901730 |
| H | -6.117002 | 0.568290  | -13.807458 |
| H | -6.027588 | -1.196888 | -14.109175 |
| H | -4.248657 | 2.665312  | -15.661527 |
| H | -3.899706 | 4.252452  | -14.937924 |
| H | -3.149765 | 2.777081  | -14.265204 |
| H | 2.257467  | -3.553042 | 2.614403   |
| H | 1.135794  | -2.299169 | 3.193923   |
| H | 1.124395  | -2.787741 | 1.475093   |

**Table S4.** Cartesian coordinates of optimized structure of compound **5**

Total energy: 3452.63431309 Hartrees

| Atom | x          | y         | z         |
|------|------------|-----------|-----------|
| C    | -11.127738 | -2.830531 | 0.388736  |
| C    | -11.420704 | -3.612185 | -0.730317 |
| C    | -10.427656 | -4.352242 | -1.398596 |
| C    | -9.100419  | -4.308422 | -0.895372 |
| C    | -8.815324  | -3.517776 | 0.236429  |
| C    | -9.800804  | -2.784667 | 0.868850  |
| C    | -10.736624 | -5.176460 | -2.583674 |
| C    | -9.705510  | -5.925922 | -3.210136 |
| C    | -8.345999  | -5.880534 | -2.691200 |
| C    | -8.042411  | -5.072065 | -1.542628 |
| C    | -12.032173 | -5.234542 | -3.130879 |
| C    | -12.325437 | -6.026689 | -4.241992 |

|   |            |           |           |
|---|------------|-----------|-----------|
| C | -11.293341 | -6.773533 | -4.848415 |
| C | -10.010344 | -6.712975 | -4.339106 |
| N | -7.388632  | -6.599159 | -3.299334 |
| C | -6.121899  | -6.544379 | -2.804371 |
| C | -5.813895  | -5.731769 | -1.665393 |
| N | -6.796103  | -5.007148 | -1.050776 |
| C | -5.079554  | -7.292878 | -3.414404 |
| C | -3.801457  | -7.234584 | -2.919247 |
| C | -3.490461  | -6.428730 | -1.775586 |
| C | -4.492381  | -5.696841 | -1.160984 |
| N | -13.651059 | -6.077965 | -4.770179 |
| N | -12.154807 | -2.070014 | 1.020730  |
| N | -2.147602  | -6.393244 | -1.302220 |
| C | -12.212060 | -1.941765 | 2.433510  |
| C | -13.157201 | -1.434221 | 0.208306  |
| C | -14.781846 | -6.098722 | -3.911578 |
| C | -13.834041 | -6.078480 | -6.194946 |
| C | -1.576372  | -5.187763 | -0.805335 |
| C | -1.385481  | -7.609374 | -1.265886 |
| C | -14.518388 | -1.634510 | 0.479924  |
| C | -15.487162 | -1.012687 | -0.309339 |
| C | -15.109304 | -0.199570 | -1.381982 |
| C | -13.752163 | -0.005535 | -1.657140 |
| C | -12.777980 | -0.612999 | -0.863619 |
| C | -12.666321 | -0.746110 | 3.022364  |
| C | -12.736368 | -0.630430 | 4.405073  |
| C | -12.351355 | -1.693511 | 5.234696  |
| C | -11.897403 | -2.890367 | 4.650451  |
| C | -11.832320 | -3.014385 | 3.271642  |

|   |            |           |           |
|---|------------|-----------|-----------|
| C | -15.969826 | -5.436395 | -4.275642 |
| C | -17.076171 | -5.471421 | -3.435360 |
| C | -17.026337 | -6.152566 | -2.210795 |
| C | -15.841871 | -6.818785 | -1.844288 |
| C | -14.739372 | -6.796738 | -2.682971 |
| C | -14.689035 | -7.013726 | -6.797778 |
| C | -14.865439 | -7.009669 | -8.181805 |
| C | -14.181202 | -6.087275 | -8.979708 |
| C | -13.322255 | -5.161456 | -8.380452 |
| C | -13.152574 | -5.149331 | -6.995106 |
| C | -0.066290  | -7.631207 | -1.745082 |
| C | 0.671969   | -8.814001 | -1.707192 |
| C | 0.101325   | -9.989520 | -1.208100 |
| C | -1.214758  | -9.970295 | -0.738387 |
| C | -1.954769  | -8.786698 | -0.757649 |
| C | -0.720361  | -5.210492 | 0.310539  |
| C | -0.145575  | -4.032499 | 0.774372  |
| C | -0.414329  | -2.808787 | 0.146172  |
| C | -1.272984  | -2.781873 | -0.968580 |
| C | -1.842472  | -3.954004 | -1.439234 |
| N | -18.207528 | -6.116914 | -1.428875 |
| N | -18.146608 | -6.702236 | -0.290110 |
| C | -19.340403 | -6.672157 | 0.488181  |
| C | -20.548002 | -6.086835 | 0.070426  |
| C | -21.655016 | -6.116473 | 0.913532  |
| C | -21.570275 | -6.725730 | 2.173765  |
| C | -20.369027 | -7.308268 | 2.588621  |
| C | -19.256701 | -7.282625 | 1.747092  |
| N | -12.462416 | -1.466210 | 6.629041  |

|   |            |           |           |
|---|------------|-----------|-----------|
| N | -12.108104 | -2.435693 | 7.388599  |
| C | -12.224528 | -2.199814 | 8.789743  |
| C | -12.676468 | -0.996858 | 9.358827  |
| C | -12.749442 | -0.875248 | 10.743393 |
| C | -12.375639 | -1.944695 | 11.569795 |
| C | -11.926132 | -3.141090 | 11.003210 |
| C | -11.850130 | -3.268130 | 9.616005  |
| N | 0.224868   | -1.670824 | 0.700634  |
| N | -0.024256  | -0.551670 | 0.128768  |
| C | 0.623179   | 0.588717  | 0.687719  |
| C | 1.480395   | 0.550178  | 1.800718  |
| C | 2.060198   | 1.727738  | 2.263489  |
| C | 1.793647   | 2.947643  | 1.625316  |
| C | 0.940521   | 2.985413  | 0.518481  |
| C | 0.356123   | 1.808184  | 0.050723  |
| H | -12.443037 | -3.641776 | -1.071040 |
| H | -7.794964  | -3.489930 | 0.587671  |
| H | -9.560735  | -2.169073 | 1.723165  |
| H | -12.831672 | -4.655464 | -2.697389 |
| H | -11.514039 | -7.393203 | -5.705145 |
| H | -9.209760  | -7.280570 | -4.788714 |
| H | -5.326099  | -7.890197 | -4.280499 |
| H | -3.006380  | -7.789902 | -3.394643 |
| H | -4.297849  | -5.087084 | -0.291950 |
| H | -14.808351 | -2.274480 | 1.301270  |
| H | -16.534622 | -1.175853 | -0.094553 |
| H | -15.862354 | 0.275402  | -1.995821 |
| H | -13.450708 | 0.626439  | -2.481841 |
| H | -11.727942 | -0.456079 | -1.066960 |

|   |            |            |            |
|---|------------|------------|------------|
| H | -12.954949 | 0.082343   | 2.392784   |
| H | -13.076808 | 0.282980   | 4.871708   |
| H | -11.618810 | -3.709024  | 5.296209   |
| H | -11.501514 | -3.942518  | 2.828877   |
| H | -16.014503 | -4.894824  | -5.208701  |
| H | -17.992487 | -4.962667  | -3.699079  |
| H | -15.818363 | -7.356593  | -0.908845  |
| H | -13.839461 | -7.325436  | -2.404729  |
| H | -15.205961 | -7.735618  | -6.181494  |
| H | -15.526631 | -7.734977  | -8.636897  |
| H | -14.314886 | -6.091017  | -10.052814 |
| H | -12.791787 | -4.441010  | -8.988640  |
| H | -12.497403 | -4.426590  | -6.529696  |
| H | 0.369763   | -6.725931  | -2.143122  |
| H | 1.687870   | -8.819867  | -2.078960  |
| H | 0.674367   | -10.906292 | -1.185917  |
| H | -1.663516  | -10.872439 | -0.344606  |
| H | -2.966755  | -8.768180  | -0.378440  |
| H | -0.515778  | -6.146943  | 0.807880   |
| H | 0.509271   | -4.031908  | 1.634052   |
| H | -1.463380  | -1.836649  | -1.453324  |
| H | -2.489679  | -3.930830  | -2.303806  |
| H | -20.590767 | -5.624187  | -0.903578  |
| H | -22.586236 | -5.667569  | 0.593904   |
| H | -22.434760 | -6.745298  | 2.823933   |
| H | -20.300587 | -7.778848  | 3.560063   |
| H | -18.314353 | -7.724598  | 2.037664   |
| H | -12.959111 | -0.187057  | 8.703989   |
| H | -13.096534 | 0.050115   | 11.183952  |

|   |            |           |           |
|---|------------|-----------|-----------|
| H | -12.434766 | -1.843049 | 12.645278 |
| H | -11.636733 | -3.967686 | 11.637973 |
| H | -11.506222 | -4.178871 | 9.146821  |
| H | 1.671348   | -0.399482 | 2.276303  |
| H | 2.720053   | 1.701189  | 3.120607  |
| H | 2.247914   | 3.859083  | 1.990501  |
| H | 0.732621   | 3.924972  | 0.024665  |
| H | -0.308002  | 1.803186  | -0.801770 |

**Table S5.** Cartesian coordinates of optimized structure of compound **6**

Total energy: 1738.59276454 Hartrees

| Atom | x         | y        | z        |
|------|-----------|----------|----------|
| C    | -5.002911 | 3.490685 | 7.451179 |
| C    | -6.149905 | 3.228579 | 6.686530 |
| C    | -6.087318 | 2.720666 | 5.378457 |
| C    | -4.808774 | 2.471854 | 4.809551 |
| C    | -3.659051 | 2.745469 | 5.571972 |
| C    | -3.740783 | 3.238871 | 6.861316 |
| C    | -7.306221 | 2.455817 | 4.582844 |
| C    | -7.182785 | 1.934187 | 3.267426 |
| C    | -5.871781 | 1.665614 | 2.694659 |
| C    | -4.685534 | 1.935307 | 3.460867 |
| C    | -8.593682 | 2.692782 | 5.093325 |
| C    | -9.758326 | 2.444572 | 4.350624 |
| C    | -9.608720 | 1.932246 | 3.038787 |
| C    | -8.349911 | 1.681834 | 2.524223 |
| N    | -5.786727 | 1.166586 | 1.451985 |
| C    | -4.551207 | 0.921876 | 0.934423 |



|   |            |           |           |
|---|------------|-----------|-----------|
| C | -3.366581  | 1.184164  | 1.693933  |
| N | -3.464613  | 1.697186  | 2.960415  |
| C | -4.407366  | 0.390658  | -0.371437 |
| C | -3.163057  | 0.136923  | -0.894245 |
| C | -1.961768  | 0.409922  | -0.150369 |
| C | -2.096138  | 0.926502  | 1.137730  |
| N | -11.031824 | 2.678771  | 4.908978  |
| N | -5.117848  | 4.007769  | 8.758843  |
| N | -0.701625  | 0.162815  | -0.718257 |
| C | -3.933850  | 4.538866  | 9.452289  |
| C | -4.364250  | 5.553828  | 10.510620 |
| O | -5.327096  | 4.972490  | 11.439410 |
| C | -6.513057  | 4.503274  | 10.730308 |
| C | -6.129908  | 3.461413  | 9.685857  |
| C | -12.243964 | 2.182089  | 4.240055  |
| C | -13.349452 | 1.953101  | 5.270392  |
| O | -13.606955 | 3.160422  | 6.047631  |
| C | -12.399660 | 3.597993  | 6.740710  |
| C | -11.283073 | 3.872939  | 5.739736  |
| C | -0.545731  | -0.212858 | -2.132140 |
| C | 0.788742   | 0.305372  | -2.670133 |
| O | 1.903894   | -0.153860 | -1.852266 |
| C | 1.750581   | 0.298380  | -0.472926 |
| C | 0.448674   | -0.231200 | 0.117768  |
| H | -7.110589  | 3.463790  | 7.114713  |
| H | -2.698934  | 2.540406  | 5.122382  |
| H | -2.831898  | 3.401875  | 7.420236  |
| H | -8.699993  | 3.043632  | 6.106637  |
| H | -10.472934 | 1.755225  | 2.416968  |

|   |            |           |           |
|---|------------|-----------|-----------|
| H | -8.234174  | 1.297006  | 1.521904  |
| H | -5.306307  | 0.176394  | -0.932293 |
| H | -3.096451  | -0.302403 | -1.877219 |
| H | -1.245741  | 1.176679  | 1.752062  |
| H | -3.290104  | 5.039868  | 8.730756  |
| H | -3.354121  | 3.735802  | 9.931043  |
| H | -4.807638  | 6.430189  | 10.024854 |
| H | -3.518568  | 5.865316  | 11.119142 |
| H | -7.014860  | 5.352103  | 10.251915 |
| H | -7.162485  | 4.077664  | 11.491751 |
| H | -7.012818  | 3.153007  | 9.132672  |
| H | -5.728366  | 2.573540  | 10.195639 |
| H | -12.023809 | 1.233991  | 3.752141  |
| H | -12.597939 | 2.888381  | 3.474677  |
| H | -13.063120 | 1.138357  | 5.944724  |
| H | -14.291162 | 1.708657  | 4.784622  |
| H | -12.085888 | 2.827509  | 7.454134  |
| H | -12.679430 | 4.501228  | 7.277997  |
| H | -10.377336 | 4.157711  | 6.267916  |
| H | -11.576283 | 4.717985  | 5.099987  |
| H | -1.344215  | 0.233330  | -2.720938 |
| H | -0.591883  | -1.303719 | -2.259497 |
| H | 0.778032   | 1.400928  | -2.692865 |
| H | 0.977777   | -0.076353 | -3.670737 |
| H | 1.763239   | 1.393555  | -0.441632 |
| H | 2.612551   | -0.091378 | 0.063262  |
| H | 0.325322   | 0.149696  | 1.126617  |
| H | 0.502387   | -1.327258 | 0.177376  |
